# Supplementary material for: Taxi-out time prediction of departure flights based on Stacking and SHAP
Source: Research Square preprint supplement (doi:10.21203/rs.3.rs-7752315/v1), 2025-10-20
Supplement: Supplementary file 1 [file b3f9dd333c62976c08acca44.xlsx]

## Sheet: taxi-out time
ID	x1	x2	x3	x4	x5	x6	x7	x8	x9	x10	Unimpeded Taxi-out Time	Dynamic Taxi-out Time	Taxi-out Time
1	0	4	0	0	1432.8	4137.02	0	2	4	2	542.141	939.859	1482
2	0	4	1	0	1432.8	2615.38	1482	2	3	1	350.664	879.336	1230
3	1	5	3	0	1432.8	2842.53	1356	2	3	1	401.969	918.031	1320
4	1	8	4	0	1432.8	3727.58	1344	2	4	2	595.125	1481.87	2077
5	2	4	2	0	1432.8	2278.78	1527.25	2	3	1	336.137	718.863	1055
6	0	6	2	0	1133.12	2159.78	1432.8	2	3	1	388.606	679.394	1068
7	0	7	2	0	1133.12	3724.7	1350	1	4	2	410.583	791.417	1202
8	0	7	3	0	1133.12	2944.4	1325.33	2	3	1	401.969	827.031	1229
9	0	10	4	0	1133.12	3811.4	1326.2	2	4	1	595.125	590.875	1186
10	0	9	4	0	1133.12	2228.96	1171.25	2	3	1	388.606	601.394	990
11	1	9	5	0	1133.12	1858.62	1135	2	3	2	271.833	801.167	1073
12	1	9	6	0	1133.12	2615.38	1124.67	2	3	1	350.664	828.336	1179
13	2	7	6	0	1133.12	2798.33	1132.43	2	3	2	377.932	760.068	1138
14	3	6	2	0	662.4	3191.29	1133.12	1	4	1	368.444	101.556	470
15	1	7	5	0	662.4	2574.19	1059.44	2	3	1	350.664	517.336	868
16	0	4	4	0	662.4	2468.79	986.286	2	3	1	350.664	369.336	720
17	1	1	1	0	662.4	2615.38	908	2	3	1	350.664	599.336	950
18	1	4	1	1	1056.4	3268.97	627	4	4	2	368.444	729.556	1098
19	1	4	2	1	1056.4	2777.15	784	2	3	2	401.969	779.031	1181
20	2	3	0	0	1056.4	2228.96	883.25	2	3	1	388.606	312.394	701
21	1	6	4	2	1056.4	3831.54	821	2	4	2	443.577	721.423	1165
22	1	5	4	1	1056.4	3590.79	889.8	2	4	2	480.998	656.002	1137
23	2	3	0	1	788.75	2937.6	1056.4	1	3	1	401.969	29.0311	431
24	0	4	3	2	788.75	2545.42	952.167	2	3	1	381.27	381.73	763
25	0	3	1	6	788.75	3338.54	874	2	4	1	298.498	702.502	1001
26	0	2	1	6	788.75	3459.63	833	2	4	1	296.131	663.869	960
27	0	4	2	4	922.667	2615.38	908	2	3	1	350.664	787.336	1138
28	0	3	1	3	922.667	2468.79	1049	2	3	1	350.664	458.336	809
29	0	3	2	4	922.667	3664.81	969	2	4	1	480.998	340.002	821
30	1	6	3	8	1535.8	4195.99	922.667	3	5	1	922.696	935.304	1858
31	1	4	0	4	1535.8	2692.15	1162.67	2	3	1	320.432	699.568	1020
32	0	4	2	7	1535.8	4306.75	1127	3	5	2	922.696	672.304	1595
33	1	5	4	7	1535.8	4251.57	1220.6	3	5	1	922.696	951.304	1874
34	1	5	3	5	1535.8	2615.38	1329.5	2	3	1	350.664	981.336	1332
35	0	2	2	3	1021	2802.91	1600.33	2	3	1	401.969	619.031	1021
36	0	0	0	0	875.333	2265.97	1021	3	3	1	336.137	442.863	779
37	0	1	0	0	875.333	4123.42	779	3	5	1	922.696	197.304	1120
38	0	1	1	0	875.333	2907.52	949.5	2	3	1	401.969	325.031	727
39	0	1	0	0	909.667	2798.33	923.5	2	3	1	377.932	367.068	745
40	1	4	2	2	909.667	3665.85	736	2	4	2	410.583	834.417	1245
41	1	3	0	1	909.667	2777.15	995	2	3	1	401.969	337.031	739
42	0	3	2	4	1264	3756.22	909.667	4	4	2	480.998	704.002	1185
43	0	3	3	4	1264	4055.94	978.5	3	5	2	922.696	420.304	1343
44	0	5	0	0	1293	1539.55	0	1	1	1	305.267	876.733	1182
45	0	7	1	0	1293	2615.38	1182	2	3	1	350.664	1053.34	1404
46	0	8	2	0	1270.56	1581.39	1293	1	1	1	305.267	649.733	955
47	1	10	4	2	1270.56	4251.57	1180.33	3	5	1	922.696	551.304	1474
48	1	9	3	1	1270.56	4066.92	1253.75	2	4	1	443.577	564.423	1008
49	1	10	6	4	1270.56	2728.76	1204.6	2	3	1	532.915	1050.09	1583
50	1	9	4	2	1270.56	1900.99	1267.67	1	2	1	285.463	828.537	1114
51	0	10	6	4	1270.56	2545.29	1245.71	2	3	1	320.432	955.568	1276
52	0	11	6	5	1270.56	2316.45	1249.5	2	3	1	381.27	1041.73	1423
53	0	11	6	6	1270.56	3910	1268.78	2	4	1	443.577	958.423	1402
54	0	13	6	4	1270.56	2157.82	1279.38	2	3	1	465.192	734.808	1200
55	1	13	5	2	1245.64	3181.88	1286.57	2	4	1	368.444	641.556	1010
56	1	9	3	1	1245.64	2536.92	1286.86	2	3	1	350.664	309.336	660
57	0	13	5	2	1245.64	2236.15	1155	2	3	1	444.958	905.042	1350
58	0	12	4	1	1245.64	2265.97	1179.38	2	3	1	336.137	841.863	1178
59	2	15	7	2	1245.64	4137.02	1187.38	2	4	1	542.141	889.859	1432
60	2	15	8	3	1245.64	2545.42	1214.56	2	3	1	320.432	1151.57	1472
61	2	13	5	1	1245.64	2574.19	1236.33	2	3	1	350.664	789.336	1140
62	1	15	7	4	1245.64	3060	1204.89	2	4	1	298.498	1191.5	1490
63	3	13	4	2	1245.64	2013.58	1233.4	2	3	1	444.958	616.042	1061
64	0	16	8	4	1245.64	3530.77	1199.3	2	4	2	396.029	1145.97	1542
65	2	16	10	4	1245.64	3831.54	1233.5	2	4	1	443.577	923.423	1367
66	1	15	8	3	998.615	1739.23	1245.64	2	3	1	438.014	671.986	1110
67	1	13	6	3	998.615	4236.92	1234.33	2	4	1	542.141	309.859	852
68	0	16	8	3	998.615	2550	1204.92	2	3	1	381.27	654.73	1036
69	0	16	9	4	998.615	3504.62	1206.92	1	4	1	296.131	704.869	1001
70	0	14	7	3	998.615	3295.38	1233.15	2	4	1	298.498	781.502	1080
71	0	14	7	2	998.615	3073.08	1215.25	1	4	1	368.444	425.556	794
72	1	17	9	2	998.615	3282.31	1133.91	1	4	1	368.444	668.556	1037
73	1	16	9	3	998.615	2785.38	1124.55	2	3	1	320.432	805.568	1126
74	1	15	7	3	998.615	3112.31	1094.5	2	4	2	368.444	749.556	1118
75	3	12	4	1	998.615	2131.54	1096.64	1	3	1	444.958	202.042	647
76	0	15	8	3	998.615	1935.38	1015.27	2	3	1	444.958	598.042	1043
77	0	15	7	2	998.615	2510.77	1017.58	2	3	1	441.685	586.315	1028
78	1	16	9	3	998.615	3338.54	989.333	1	4	1	298.498	811.502	1110
79	1	13	5	2	1289.77	3583.08	998.615	1	4	1	480.998	398.002	879
80	4	18	12	4	1289.77	4289.23	980.846	2	4	1	542.141	860.859	1403
81	1	15	7	3	1289.77	3465.38	1011	1	4	1	296.131	656.869	953
82	1	14	6	2	1289.77	3465.38	1016.85	1	4	1	296.131	470.869	767
83	1	14	7	2	1289.77	3191.29	998.846	1	4	1	368.444	510.556	879
84	1	14	8	2	1289.77	2066.15	983.385	2	2	1	272.182	627.818	900
85	2	13	6	2	1289.77	3190.77	977.429	2	4	2	368.444	295.556	664
86	0	15	9	2	1289.77	3452.31	956.533	1	4	1	396.029	575.971	972
87	1	13	7	2	1289.77	3459.63	1077.21	1	4	1	296.131	499.869	796
88	2	10	5	1	1289.77	2523.85	1186	1	3	1	381.27	262.73	644
89	6	21	15	16	2186	2772.31	1556.55	2	3	2	230.966	3308.03	3539
90	3	13	10	11	2186	2118.46	1834.38	2	3	1	388.606	2070.39	2459
91	3	12	8	6	2186	2471.54	2414.12	1	2	1	272.182	1467.82	1740
92	0	9	4	4	780.5	2236.15	1562.5	2	2	2	272.182	653.818	926
93	0	9	4	4	780.5	2066.15	1350.33	2	3	1	388.606	568.394	957
94	1	10	4	5	780.5	1909.23	941.5	2	3	1	271.833	431.167	703
95	1	9	3	3	780.5	1713.08	862	1	2	1	285.463	250.537	536
96	0	14	5	6	1460.28	2159.78	780.5	1	3	1	388.606	435.394	824
97	0	15	6	8	1460.28	2550	789.2	2	3	1	381.27	648.73	1030
98	1	19	6	9	1460.28	2249.23	829.333	2	3	1	388.606	991.394	1380
99	1	19	6	8	1460.28	3478.46	908	2	4	1	595.125	730.875	1326
100	2	18	4	7	1460.28	3530.77	960.25	1	4	2	396.029	682.971	1079
101	1	19	7	9	1460.28	3724.7	973.444	2	4	1	410.583	1011.42	1422
102	7	22	13	13	1460.28	1765.38	1018.3	2	3	1	271.833	1942.17	2214
103	2	18	7	9	1460.28	2210	1127	2	3	1	388.606	1080.39	1469
104	3	18	5	6	1460.28	2907.52	1155.5	1	3	1	401.969	659.031	1061
105	1	18	8	8	1460.28	2981.54	1148.23	2	3	2	377.932	979.068	1357
106	1	18	8	7	1460.28	2944.4	1163.14	2	3	1	401.969	994.031	1396
107	3	19	10	8	1460.28	2170.77	1178.67	2	4	1	480.998	1119	1600
108	3	18	9	8	1460.28	3504.62	1223.6	2	4	1	480.998	983.002	1464
109	1	21	12	10	1460.28	2545.29	1238.62	1	3	1	320.432	1470.57	1791
110	2	24	14	13	1460.28	3556.92	1271.12	2	4	2	396.029	1781.97	2178
111	2	24	15	12	1460.28	2265.97	1342.94	2	3	1	336.137	1763.86	2100
112	6	17	8	5	1460.28	2692.15	1385	1	3	1	320.432	607.568	928
113	2	20	11	11	1460.28	3138.46	1360.95	1	4	1	368.444	1297.56	1666
114	0	21	13	10	1395.56	3465.38	1460.28	2	4	1	296.131	1503.87	1800
115	1	19	11	9	1395.56	1896.15	1568.33	2	3	1	444.958	1177.04	1622
116	5	20	14	10	1395.56	3727.58	1580.25	2	4	2	595.125	1291.87	1887
117	2	17	9	7	1395.56	2615.38	1603.85	2	3	1	350.664	1082.34	1433
118	3	14	6	5	1395.56	1909.23	1655.42	2	2	1	285.463	692.537	978
119	1	16	8	6	1395.56	2545.42	1638.3	1	3	1	320.432	889.568	1210
120	1	15	8	7	1395.56	2615.38	1580.2	2	3	1	350.664	937.336	1288
121	1	14	8	4	1395.56	2563.08	1485.5	2	4	1	342.592	737.408	1080
122	0	20	10	5	1395.56	2574.19	1440.44	2	3	1	350.664	911.336	1262
123	0	17	8	4	1040.87	2937.6	1345	1	3	1	401.969	597.031	999
124	9	28	17	9	1040.87	3988.46	1306.56	3	5	1	922.696	1253.3	2176
125	4	19	10	5	1040.87	3465.38	1393.5	2	4	1	296.131	1041.87	1338
126	2	15	6	3	1040.87	1935.38	1365.1	1	2	1	285.463	439.537	725
127	5	17	9	3	1040.87	2785.38	1228.44	1	3	1	320.432	765.568	1086
128	4	13	4	2	1040.87	2157.69	1214.2	1	3	1	381.27	263.73	645
129	4	15	7	2	1040.87	2523.85	1162.45	1	3	1	381.27	529.73	911
130	4	22	12	5	1040.87	2777.15	1141.5	2	3	2	401.969	1102.03	1504
131	6	13	3	1	1040.87	1778.46	1169.38	1	2	1	285.463	165.537	451
132	4	17	10	5	1040.87	2228.96	1128.85	2	3	1	388.606	818.394	1207
133	5	12	4	1	1040.87	2419.23	1115.33	1	2	1	272.182	249.818	522
134	1	20	10	4	1040.87	2615.38	1069.69	2	3	1	350.664	861.336	1212
135	4	13	6	3	1040.87	3007.69	1079.86	1	4	1	368.444	353.556	722
136	0	22	9	4	1040.87	1870	1054.29	2	2	1	285.463	853.537	1139
137	0	21	8	4	1040.87	3452.31	1045.5	1	4	1	396.029	579.971	976
138	0	21	8	4	1126.83	4137.02	1040.87	1	4	1	542.141	576.859	1119
139	0	19	7	3	1126.83	1556.15	939.923	1	1	1	305.267	544.733	850
140	9	26	16	6	1126.83	3665.85	933.5	2	4	2	410.583	1421.42	1832
141	5	20	11	5	1126.83	2772.31	993.4	2	3	1	230.966	1050.03	1281
142	5	20	10	4	1126.83	2118.46	1011.38	2	3	1	388.606	748.394	1137
143	3	18	7	3	1126.83	2545.42	1018.76	1	3	1	381.27	509.73	891
144	4	20	9	4	1126.83	2278.78	1011.67	2	3	1	336.137	701.863	1038
145	5	21	13	5	1126.83	2867.51	1029.06	2	3	1	377.932	982.068	1360
146	4	19	10	5	1126.83	3910	1046.47	1	4	1	443.577	627.423	1071
147	6	15	5	3	1126.83	2746.15	1047.7	1	1	1	305.267	296.733	602
148	3	17	9	4	1126.83	2615.38	1026.48	2	3	1	350.664	609.336	960
149	2	19	11	4	1126.83	2890	1020.48	2	1	1	305.267	779.733	1085
150	1	24	14	7	1126.83	3556.92	1023.95	1	4	1	396.029	1094.97	1491
151	1	22	12	5	1126.83	2066.15	1071.56	2	3	1	388.606	781.394	1170
152	0	21	10	5	1126.83	3664.81	1125.12	2	4	1	480.998	612.002	1093
153	0	22	11	5	1126.83	2079.23	1123.24	2	2	1	272.182	985.818	1258
154	0	18	8	4	1126.83	2159.78	1139.88	2	3	1	388.606	575.394	964
155	0	20	9	5	1126.83	2026.92	1129.53	2	2	1	285.463	795.537	1081
156	0	19	8	5	1149.31	2641.54	1127.29	2	3	1	320.432	705.568	1026
157	2	21	10	6	1149.31	2667.69	1121.67	2	3	2	230.966	1089.03	1320
158	2	19	9	5	1149.31	2265.97	1132.11	2	3	1	336.137	717.863	1054
159	2	18	8	5	1149.31	3504.62	1128.2	2	4	1	480.998	510.002	991
160	2	21	12	6	1149.31	2484.62	1097.75	2	3	1	381.27	1028.73	1410
161	1	19	9	5	1149.31	3459.63	1121	1	4	1	296.131	901.869	1198
162	3	24	13	6	1149.31	2785.38	1125.53	2	3	1	320.432	1231.57	1552
163	2	20	11	5	1149.31	2468.79	1136.82	2	3	2	350.664	909.336	1260
164	2	19	11	5	1149.31	2798.33	1147.94	2	3	1	377.932	930.068	1308
165	4	15	6	4	1149.31	2550	1191.79	1	3	1	381.27	382.73	764
166	0	22	11	6	1149.31	2013.85	1163.27	2	3	1	444.958	792.042	1237
167	0	21	11	5	1149.31	2545.29	1167.73	2	3	1	320.432	841.568	1162
168	0	20	10	5	1149.31	2802.91	1167.38	2	3	1	401.969	687.031	1089
169	2	20	12	7	1149.31	4066.92	1167.12	2	4	1	443.577	756.423	1200
170	1	20	10	6	1149.31	2157.69	1163.5	2	3	1	336.137	660.863	997
171	1	18	8	5	1149.31	2316.45	1153.71	1	3	1	381.27	439.73	821
172	2	17	11	7	1034.5	3268.97	1149.31	2	4	2	368.444	616.556	985
173	2	15	8	6	1034.5	2536.92	1135.2	2	3	1	350.664	429.336	780
174	1	15	10	7	1034.5	2393.08	1113	2	3	1	381.27	568.73	950
175	1	16	11	9	1034.5	2842.53	1114.2	2	3	1	401.969	690.031	1092
176	4	14	6	5	1034.5	2907.52	1112.81	1	3	1	401.969	116.031	518
177	0	17	11	9	1034.5	2249.23	1077.82	2	3	1	388.606	750.394	1139
178	0	15	10	9	1034.5	2615.38	1053.38	2	3	1	350.664	738.336	1089
179	1	17	11	11	1034.5	3530.77	1024.44	2	4	1	396.029	1006.97	1403
180	8	19	18	17	1034.5	3779.23	1015.07	2	4	1	443.577	1972.42	2416
181	2	9	3	3	1034.5	2545.42	1115.83	1	3	1	320.432	80.5676	401
182	1	10	4	6	1034.5	3674.62	1049.25	1	4	2	595.125	181.875	777
183	2	11	6	7	1034.5	2777.15	1030.92	2	3	2	401.969	696.031	1098
184	4	10	7	7	1034.5	3724.7	1036.08	2	4	2	410.583	763.417	1174
185	3	9	3	5	1034.5	2301.54	1045.93	2	3	1	336.137	324.863	661
186	3	9	7	7	1025.5	3727.58	1034.5	2	4	2	595.125	604.875	1200
187	3	8	3	3	1025.5	2278.78	1080.67	2	3	1	336.137	283.863	620
188	3	7	3	2	1025.5	2837.69	1083.9	1	1	1	305.267	274.733	580
189	0	9	5	6	1025.5	2944.4	813.875	2	3	1	401.969	645.031	1047
190	1	6	2	5	1025.5	3556.92	911.429	2	4	2	396.029	538.971	935
191	1	5	1	4	1025.5	2157.69	888.143	2	3	1	381.27	338.73	720
192	2	8	4	8	1025.5	2615.38	888.143	2	3	1	350.664	1149.34	1500
193	2	11	6	8	1025.5	2692.15	937.444	2	3	1	320.432	1281.57	1602
194	2	5	2	4	873.375	2785.38	1000.57	1	1	1	305.267	335.733	641
195	2	8	3	4	873.375	2545.42	1003.57	2	3	1	381.27	337.73	719
196	0	8	3	2	873.375	2545.29	1023.43	2	3	1	320.432	451.568	772
197	0	9	4	3	873.375	2981.54	984.143	2	3	2	377.932	668.068	1046
198	0	9	5	4	873.375	3295.38	991.875	2	4	1	298.498	789.502	1088
199	1	8	5	4	873.375	2210	1002.56	2	3	1	388.606	567.394	956
200	1	7	4	3	873.375	2772.31	997.9	2	3	2	230.966	541.034	772
201	0	7	5	4	873.375	2510.77	981.6	1	3	1	320.432	672.568	993
202	0	8	5	4	895.222	2667.69	873.375	2	3	2	230.966	707.034	938
203	0	7	3	2	895.222	2536.92	910.5	2	3	1	350.664	609.336	960
204	2	11	4	3	895.222	2867.51	964.714	2	3	1	377.932	613.068	991
205	1	6	2	1	895.222	4289.23	956.857	2	4	1	542.141	80.8588	623
206	1	7	2	2	895.222	2785.38	890.429	2	3	1	320.432	399.568	720
207	0	11	4	4	895.222	3665.85	869.125	2	4	2	410.583	550.417	961
208	3	12	7	5	895.222	2157.69	865.5	2	3	1	336.137	758.863	1095
209	3	11	7	4	895.222	3338.54	898.286	2	4	1	298.498	781.502	1080
210	2	10	3	3	895.222	3831.54	921	1	4	1	443.577	245.423	689
211	2	10	3	3	748.1	2183.85	895.222	1	2	1	272.182	370.818	643
212	2	10	4	3	748.1	2249.23	862.444	2	3	1	388.606	304.394	693
213	2	10	9	6	748.1	2393.08	845.5	2	3	1	381.27	826.73	1208
214	1	8	6	3	748.1	2066.15	878.455	1	3	1	388.606	334.394	723
215	1	7	5	3	748.1	2159.78	856.909	2	3	1	388.606	300.394	689
216	0	7	7	3	748.1	2574.19	842.917	1	3	1	350.664	385.336	736
217	3	4	3	5	748.1	3478.46	839.556	2	4	1	595.125	423.875	1019
218	3	3	2	4	748.1	3465.38	831.111	2	4	1	296.131	487.869	784
219	3	3	1	3	748.1	2079.23	811.875	1	3	1	444.958	172.042	617
220	3	3	0	1	748.1	2798.46	790.222	1	1	1	305.267	63.7326	369
221	1	7	2	5	802.75	2798.33	615.6	2	3	2	377.932	565.068	943
222	2	7	3	5	802.75	4472.31	670.167	2	4	2	542.141	634.859	1177
223	2	6	0	3	802.75	2576.15	742.571	1	3	1	441.685	243.315	685
224	1	7	4	4	802.75	3530.77	735.375	2	4	1	396.029	531.971	928
225	1	8	5	4	802.75	2301.54	756.778	2	3	1	336.137	630.863	967
226	1	8	6	3	802.75	2772.31	777.8	2	3	2	230.966	789.034	1020
227	4	6	2	2	802.75	3504.62	777.9	1	4	1	296.131	116.869	413
228	0	6	4	2	809	3724.7	802.75	2	4	2	410.583	505.417	916
229	0	4	3	2	809	2523.85	815.333	2	3	1	381.27	625.73	1007
230	0	3	2	0	809	2802.91	889.125	1	3	1	401.969	418.031	820
231	0	2	1	3	809	3556.92	914.333	1	4	2	396.029	96.9708	493
232	0	3	1	6	625.909	2228.96	809	2	3	1	388.606	328.394	717
233	0	3	1	4	625.909	3713.85	676.667	1	4	1	443.577	59.4228	503
234	0	4	2	4	625.909	3465.38	633.25	1	4	1	296.131	180.869	477
235	0	5	2	4	625.909	2157.69	602	1	3	1	336.137	296.863	633
236	1	8	3	3	625.909	3452.31	564.6	1	4	1	396.029	217.971	614
237	2	7	4	4	625.909	2157.69	572.833	2	3	1	336.137	496.863	833
238	2	6	5	4	625.909	3811.4	574.25	2	4	1	595.125	244.875	840
239	1	5	3	3	625.909	2210	584.222	2	3	1	388.606	211.394	600
240	0	8	5	4	625.909	2667.69	585.8	2	3	2	230.966	796.034	1027
241	2	6	3	6	720.833	2777.15	629.444	2	3	2	401.969	618.031	1020
242	2	6	2	5	720.833	3465.38	668.5	2	4	1	296.131	483.869	780
243	1	5	4	4	720.833	2278.78	665.3	2	3	1	336.137	462.863	799
244	1	5	3	4	720.833	2944.4	677.455	2	3	1	401.969	325.031	727
245	0	4	4	2	720.833	2236.15	673.2	2	3	2	336.137	364.863	701
246	0	3	0	5	752.2	2641.54	720.833	2	3	1	320.432	626.568	947
247	0	3	1	5	752.2	2265.97	694.4	2	3	1	336.137	335.863	672
248	0	3	2	6	752.2	2393.08	690.667	2	3	1	381.27	357.73	739
249	0	6	3	5	752.2	2157.69	786	2	3	1	336.137	364.863	701
250	0	4	1	2	752.2	2842.53	764.75	2	3	1	401.969	300.031	702
251	1	5	3	4	775.7	3295.38	752.2	2	4	1	298.498	528.502	827
252	1	5	2	2	775.7	2131.54	764.667	2	3	1	444.958	232.042	677
253	0	8	3	5	775.7	2692.15	719.667	1	3	1	320.432	284.568	605
254	0	7	3	6	775.7	3033.85	703.286	2	3	1	320.432	499.568	820
255	0	6	2	3	775.7	2249.23	722	2	3	1	388.606	240.394	629
256	0	7	3	5	775.7	2468.79	708.714	2	3	2	350.664	432.336	783
257	1	8	5	6	775.7	3060	718	2	4	1	298.498	720.502	1019
258	1	8	4	5	775.7	2545.42	751.444	2	3	1	320.432	591.568	912
259	2	7	6	6	775.7	2907.52	774.889	2	3	1	401.969	567.031	969
260	1	5	3	4	775.7	2574.19	804.556	1	3	1	350.664	165.336	516
261	1	4	3	3	634	2484.62	781.625	1	3	1	381.27	108.73	490
262	2	5	3	4	634	2545.42	767.25	2	3	1	381.27	701.73	1083
263	2	4	1	2	634	1739.23	800.125	2	3	1	438.014	221.986	660
264	0	5	3	2	634	3504.62	663.833	2	4	1	296.131	355.869	652
265	0	5	3	2	634	2301.54	662.143	2	3	1	336.137	317.863	654
266	2	6	4	6	777	2802.91	662.8	2	3	1	401.969	639.031	1041
267	1	4	1	4	777	2157.69	725.833	2	3	1	336.137	203.863	540
268	1	3	1	3	777	2265.97	699.286	2	3	1	336.137	174.863	511
269	1	8	4	8	777	2013.58	617.571	2	3	1	444.958	587.042	1032
270	2	8	4	9	777	2798.33	738.333	3	3	2	377.932	767.068	1145
271	2	5	2	6	777	3338.54	796.429	1	4	1	298.498	349.502	648
272	0	8	3	5	777	2867.51	740.714	2	3	1	377.932	412.068	790
273	0	8	4	7	777	3665.85	746.875	1	4	2	410.583	607.417	1018
274	1	8	4	8	906.714	4014.62	744	4	4	2	443.577	647.423	1091
275	1	7	3	5	906.714	1739.23	812.875	1	2	1	285.463	454.537	740
276	1	8	5	9	906.714	3811.4	804.778	2	4	1	595.125	575.875	1171
277	1	8	6	9	906.714	2523.85	841.4	2	3	1	381.27	806.73	1188
278	2	6	2	5	906.714	2944.4	895.444	1	3	1	401.969	199.031	601
279	0	7	4	6	906.714	2468.79	835	2	3	2	350.664	373.336	724
280	0	6	4	6	906.714	2550	915.375	2	3	1	381.27	450.73	832
281	0	3	2	4	797.8	1935.38	906.714	1	3	1	444.958	140.042	585
282	0	5	3	8	797.8	2615.38	866.5	2	3	1	350.664	625.336	976
283	0	5	1	6	797.8	2053.08	743.6	1	3	1	465.192	213.808	679
284	0	6	2	6	797.8	2615.38	732.833	2	3	1	350.664	341.336	692
285	2	10	4	7	797.8	3583.08	748	2	4	1	410.583	598.417	1009
286	1	7	2	3	797.8	2545.42	795.5	1	3	1	381.27	28.7296	410
287	4	13	8	12	797.8	2157.69	740.429	2	3	1	381.27	1136.73	1518
288	3	11	5	8	797.8	2615.38	838.429	2	3	1	350.664	618.336	969
289	3	8	3	5	797.8	3295.38	854.75	2	4	1	298.498	481.502	780
290	4	5	1	2	797.8	2545.29	846.444	1	3	1	320.432	39.5676	360
291	1	9	3	4	778	2981.54	802.125	1	3	1	377.932	191.068	569
292	1	10	6	7	778	2777.15	776.222	2	3	2	401.969	646.031	1048
293	1	9	5	6	778	2249.23	803.4	2	3	1	388.606	431.394	820
294	0	8	5	6	778	3459.63	804.909	1	4	1	296.131	515.869	812
295	1	10	7	8	778	3724.7	805.5	2	4	2	410.583	685.417	1096
296	1	9	5	6	778	2937.6	840.25	2	3	1	401.969	464.031	866
297	0	8	4	5	778	2183.85	854.75	1	3	1	465.192	292.808	758
298	1	7	4	5	778	2066.15	791.125	2	3	1	388.606	271.394	660
299	1	7	4	6	778	2574.19	791.125	2	3	1	350.664	429.336	780
300	2	6	1	3	778	3060	823.222	1	4	1	298.498	72.5021	371
301	2	8	6	10	777.091	2316.45	778	2	3	1	381.27	697.73	1079
302	2	5	4	8	777.091	2159.78	805.364	2	3	1	388.606	425.394	814
303	2	5	3	5	777.091	2842.53	806.083	1	3	1	401.969	174.031	576
304	0	6	1	5	777.091	2510.77	719.714	1	3	1	320.432	272.568	593
305	3	8	5	9	777.091	2523.85	703.875	2	3	1	381.27	812.73	1194
306	2	7	2	4	777.091	2210	758.375	2	3	1	388.606	213.394	602
307	2	7	1	4	777.091	2802.91	741	1	3	1	401.969	86.0311	488
308	1	7	3	4	777.091	2432.31	715.7	1	3	2	441.685	121.315	563
309	0	7	5	5	777.091	2236.15	701.818	2	3	1	336.137	415.863	752
310	0	7	5	7	777.091	2907.52	703.2	2	3	1	401.969	498.031	900
311	0	8	6	8	777.091	2131.54	721.091	1	3	1	444.958	542.042	987
312	0	11	2	6	1022.75	3556.92	759.875	2	4	1	396.029	569.971	966
313	0	12	2	6	1022.75	1858.62	782.778	2	3	2	271.833	646.167	918
314	4	13	6	9	1022.75	2785.38	772	2	3	1	320.432	873.568	1194
315	3	13	4	7	1022.75	3530.77	818.889	2	4	2	396.029	581.971	978
316	3	13	5	7	1022.75	3504.62	834.8	2	4	1	296.131	779.869	1076
317	2	15	7	9	1022.75	2615.38	926	2	3	1	350.664	849.336	1200
318	5	13	3	5	1022.75	2798.33	953.4	1	3	1	377.932	204.068	582
319	5	11	2	3	1022.75	2785.38	955.3	1	1	1	305.267	61.7326	367
320	0	16	8	8	1022.75	3727.58	901.818	2	4	2	595.125	422.875	1018
321	1	18	10	9	1022.75	3665.85	928.6	2	4	2	410.583	885.417	1296
322	2	17	11	10	1022.75	3465.38	962	2	4	1	296.131	1084.87	1381
323	2	17	10	8	1022.75	2545.42	996.917	2	3	1	320.432	976.568	1297
324	3	14	6	7	875.7	2615.38	1022.75	1	3	1	350.664	496.336	847
325	0	15	10	7	875.7	2777.15	1009.23	2	3	1	401.969	852.031	1254
326	1	13	8	5	875.7	2157.69	1026.71	2	3	1	381.27	709.73	1091
327	2	15	10	7	875.7	2157.69	1031	2	3	1	336.137	983.863	1320
328	2	11	6	3	875.7	2641.54	1054.6	1	3	1	320.432	431.568	752
329	1	13	9	6	875.7	2545.42	1043.53	2	3	1	381.27	693.73	1075
330	2	11	6	4	875.7	2867.51	1045.5	1	3	1	377.932	289.068	667
331	0	8	5	5	875.7	3465.38	995.923	1	4	1	296.131	344.869	641
332	0	7	5	4	875.7	2615.38	1056.45	1	3	1	350.664	228.336	579
333	0	7	5	4	961.429	2118.46	875.7	2	3	1	388.606	201.394	590
334	1	3	2	4	961.429	2265.97	805.111	2	3	1	336.137	263.863	600
335	1	3	1	3	961.429	3060	784.6	1	4	1	298.498	170.502	469
336	5	11	7	23	961.429	3459.63	582.429	2	4	1	296.131	2098.87	2395
337	2	5	1	8	961.429	4137.02	917	2	4	1	542.141	297.859	840
338	3	6	2	13	961.429	2013.58	917	2	3	1	444.958	875.042	1320
339	3	5	0	5	961.429	2615.38	1035.67	1	3	1	350.664	165.336	516
340	2	7	2	10	1011.62	3674.62	1023.33	2	4	2	595.125	385.875	981
341	1	9	6	12	1011.62	2944.4	1017.29	2	3	1	401.969	878.031	1280
342	2	8	3	7	1011.62	3295.38	1222	1	4	1	298.498	375.502	674
343	0	9	5	8	1011.62	2536.92	935.167	2	3	1	350.664	529.336	880
344	0	9	4	7	1011.62	2278.78	927.286	2	3	1	336.137	429.863	766
345	0	9	5	9	1011.62	3556.92	907.125	2	4	2	396.029	683.971	1080
346	3	10	6	17	1011.62	3583.08	882.429	2	4	1	410.583	1189.42	1600
347	1	6	3	8	1011.62	3452.31	972.125	2	4	1	396.029	435.971	832
348	2	8	4	10	1053.75	2692.15	1016	2	3	1	320.432	691.568	1012
349	2	7	3	8	1053.75	2249.23	1015.5	2	3	1	388.606	394.394	783
350	4	15	7	18	1053.75	3033.85	993.286	2	3	1	320.432	1419.57	1740
351	3	14	5	16	1053.75	4195.99	1086.62	3	5	1	922.696	560.304	1483
352	2	7	2	10	1053.75	3724.7	1162	1	4	2	410.583	396.417	807
353	2	10	2	10	1053.75	2393.08	1179.57	1	3	1	381.27	400.73	782
354	1	12	5	12	1053.75	2772.31	1129.88	2	3	2	230.966	915.034	1146
355	2	12	3	6	1053.75	2545.29	1107.57	2	3	1	320.432	356.568	677
356	3	14	8	12	1119.93	3556.92	1053.75	2	4	1	396.029	1013.97	1410
357	1	12	5	8	1119.93	3811.4	1093.33	2	4	1	595.125	385.875	981
358	2	14	7	10	1119.93	4055.94	1082.1	3	5	2	922.696	294.304	1217
359	2	14	6	8	1119.93	2937.6	1138.11	1	3	1	401.969	640.031	1042
360	0	13	8	8	1119.93	2907.52	1128.5	2	3	1	401.969	716.031	1118
361	1	17	10	10	1119.93	2468.79	1127.55	2	3	2	350.664	914.336	1265
362	2	16	11	12	1119.93	2484.62	1139	2	3	1	381.27	1042.73	1424
363	2	9	5	6	1119.93	3459.63	1112.67	1	4	1	296.131	432.869	729
364	2	16	9	12	1119.93	2728.76	1071.91	2	3	1	532.915	831.085	1364
365	2	12	6	8	1119.93	3007.69	1096.25	2	4	1	368.444	459.556	828
366	1	11	5	7	1119.93	2228.96	1095.91	2	3	1	388.606	423.394	812
367	1	14	6	10	1119.93	2545.42	1072.25	2	3	1	320.432	828.568	1149
368	4	15	10	14	1119.93	2667.69	1078.15	2	3	2	230.966	1569.03	1800
369	3	9	3	4	1119.93	2157.69	1078.15	2	3	1	336.137	203.863	540
370	2	13	5	6	1064.44	2777.15	1102.9	2	3	2	401.969	474.031	876
371	2	11	4	5	1064.44	2523.85	1082.27	2	3	1	381.27	351.73	733
372	2	13	7	9	1064.44	2079.23	1047.27	2	3	1	444.958	706.042	1151
373	2	12	5	7	1064.44	3674.62	1055.92	2	4	2	595.125	401.875	997
374	0	12	6	8	1064.44	2157.69	998.091	2	3	1	381.27	818.73	1200
375	0	12	7	8	1064.44	2615.38	1040.91	2	3	1	350.664	733.336	1084
376	2	15	10	11	1064.44	2510.77	1044.5	2	3	1	320.432	1227.57	1548
377	2	11	7	7	1064.44	2316.45	1080.91	2	3	1	381.27	701.73	1083
378	2	11	6	7	1064.44	2867.51	1081.08	3	3	1	377.932	530.068	908
379	0	9	5	6	934.167	2641.54	1064.44	1	3	1	320.432	574.568	895
380	0	9	6	7	934.167	2157.69	1047.5	2	3	1	336.137	601.863	938
381	0	7	5	9	934.167	3727.58	1037.55	2	4	2	595.125	379.875	975
382	0	6	4	9	934.167	4123.42	1078.88	2	5	1	922.696	130.304	1053
383	0	6	5	10	934.167	3530.77	1076	2	4	2	396.029	807.971	1204
384	0	2	2	4	934.167	2210	1013	2	3	1	388.606	151.394	540
385	0	3	0	8	1093.25	3181.88	932.333	2	4	2	368.444	675.556	1044
386	2	4	3	12	1093.25	4251.57	929.333	3	5	1	922.696	605.304	1528
387	2	4	2	10	1093.25	3988.46	1037.33	3	5	2	922.696	244.304	1167
388	2	3	1	6	1093.25	2802.91	1069.75	1	3	1	401.969	232.031	634
389	0	3	2	9	1120.67	3020.77	1093.25	2	4	1	368.444	816.556	1185
390	0	2	1	4	1120.67	4251.57	995.333	3	5	1	922.696	167.304	1090
391	0	2	1	5	1120.67	4550.77	1137.5	2	4	2	542.141	544.859	1087
392	0	10	4	1	1009.78	4055.94	1245.25	3	5	1	922.696	208.304	1131
393	0	10	3	1	1009.78	2615.38	1222.4	1	3	1	350.664	428.336	779
394	1	12	5	0	1009.78	2471.54	1098	2	2	1	272.182	687.818	960
395	1	12	5	1	1009.78	2079.23	1075	2	3	1	444.958	525.042	970
396	1	11	5	1	1009.78	2772.31	1060	2	3	1	230.966	823.034	1054
397	3	10	2	0	1009.78	2278.78	1059.25	2	3	1	336.137	277.863	614
398	3	18	9	1	1344.23	3665.85	1009.78	2	4	2	410.583	1072.42	1483
399	3	17	9	1	1344.23	3478.46	1057.1	2	4	1	595.125	976.875	1572
400	2	13	5	1	1344.23	1896.15	1083.6	2	3	1	444.958	412.042	857
401	2	15	5	1	1344.23	2228.96	1046.67	2	3	1	388.606	523.394	912
402	2	15	6	1	1344.23	4251.57	1033.2	3	5	1	922.696	95.3042	1018
403	1	16	8	1	1344.23	4123.42	1031.82	3	5	1	922.696	423.304	1346
404	1	15	7	1	1344.23	1858.62	1051.36	2	3	1	271.833	1166.17	1438
405	2	12	5	1	1344.23	2265.97	1083.58	2	3	1	336.137	617.863	954
406	0	15	8	1	1344.23	2842.53	1073.62	2	3	1	401.969	1042.03	1444
407	0	15	8	1	1344.23	3811.4	1100.07	2	4	1	595.125	910.875	1506
408	0	16	9	1	1344.23	2545.42	1152	2	3	1	320.432	1203.57	1524
409	2	20	12	3	1344.23	2157.69	1176.8	2	3	1	381.27	1610.73	1992
410	1	15	8	3	1344.23	2615.38	1245.6	2	3	1	350.664	1078.34	1429
411	1	14	6	2	1546.89	2340.77	1332.67	2	2	1	272.182	927.818	1200
412	1	16	9	3	1546.89	2210	1342.09	2	3	1	388.606	1245.39	1634
413	1	15	7	3	1546.89	2523.85	1446.7	2	3	1	381.27	998.73	1380
414	1	19	8	3	1546.89	2013.85	1450.1	2	3	1	444.958	1284.04	1729
415	1	15	6	3	1546.89	3818.46	1475.45	2	4	1	443.577	996.423	1440
416	1	18	8	2	1546.89	3583.08	1537.11	2	4	1	410.583	1265.42	1676
417	1	16	6	1	1546.89	3007.69	1556	2	4	1	368.444	999.556	1368
418	3	18	11	5	1546.89	2777.15	1538.67	2	3	2	401.969	1479.03	1881
419	1	16	7	4	1546.89	2574.19	1526.33	1	3	1	350.664	1263.34	1614
420	2	16	8	3	1358.64	2157.69	1546.89	1	3	1	336.137	1100.86	1437
421	2	17	9	5	1358.64	3295.38	1573.22	1	4	1	298.498	1284.5	1583
422	4	19	12	5	1358.64	3138.46	1574.2	2	4	1	368.444	1566.56	1935
423	4	14	5	3	1358.64	3583.08	1604.3	2	4	1	480.998	419.002	900
424	3	17	10	5	1358.64	1530	1556.3	1	3	1	438.014	1036.99	1475
425	3	17	9	5	1358.64	2118.46	1548.91	1	3	1	388.606	958.394	1347
426	4	14	7	4	1358.64	2785.38	1532.08	1	1	1	305.267	620.733	926
427	1	19	11	5	1358.64	2545.29	1467.45	1	3	1	320.432	1194.57	1515
428	1	15	8	3	1358.64	3465.38	1452.82	1	4	1	296.131	754.869	1051
429	2	18	9	3	1358.64	2545.42	1352.11	2	3	1	381.27	1190.73	1572
430	2	16	7	2	1358.64	3338.54	1374.1	1	4	1	298.498	905.502	1204
431	3	20	11	3	1410.6	3452.31	1350.8	1	4	1	396.029	1241.97	1638
432	2	16	8	2	1410.6	2105.38	1376.91	2	3	1	465.192	743.808	1209
433	4	20	11	5	1410.6	4550.77	1283.7	2	4	2	542.141	1240.86	1783
434	5	12	2	0	1410.6	1581.39	1372	1	1	1	305.267	271.733	577
435	2	13	5	1	1410.6	3033.85	1299.73	1	3	1	320.432	545.568	866
436	1	17	7	2	1410.6	1739.23	1263.58	2	3	1	438.014	721.986	1160
437	1	17	7	3	1410.6	2890	1257.5	2	1	1	305.267	826.733	1132
438	5	26	14	10	1410.6	3724.7	1246.09	2	4	2	410.583	1915.42	2326
439	2	19	10	5	1410.6	2576.15	1336.08	1	3	2	441.685	1159.31	1601
440	2	16	7	4	1410.6	2641.54	1343.25	1	3	1	320.432	873.568	1194
441	1	15	7	5	1410.6	3661.54	1355.17	1	4	1	443.577	774.423	1218
442	3	21	11	11	1410.6	2785.38	1344.62	2	3	1	320.432	1735.57	2056
443	2	14	6	5	1410.6	2510.77	1381.85	1	3	1	320.432	772.568	1093
444	2	21	11	13	1410.6	4433.08	1361.21	2	4	1	542.141	1557.86	2100
445	3	16	7	7	1410.6	2079.23	1410.47	2	2	2	272.182	933.818	1206
446	4	23	14	17	2004.7	2301.54	1394.36	2	4	1	595.125	2344.87	2940
447	3	17	6	7	2004.7	2026.92	1518	2	2	1	285.463	914.537	1200
448	1	17	8	10	2004.7	2419.23	1642.36	1	2	1	272.182	1133.82	1406
449	1	19	8	12	2004.7	2301.54	1622.67	2	3	1	336.137	1403.86	1740
450	2	19	10	12	2004.7	3556.92	1614	1	4	2	396.029	1872.97	2269
451	2	17	7	10	2004.7	2301.54	1674.73	1	3	1	532.915	1181.09	1714
452	1	19	10	12	2004.7	3465.38	1722	1	4	1	296.131	1907.87	2204
453	1	18	11	13	2004.7	2615.38	1762.17	2	3	1	350.664	2109.34	2460
454	2	17	8	10	2004.7	4341.54	1762.17	2	4	1	542.141	1257.86	1800
455	1	19	11	12	2004.7	3465.38	1814.71	2	4	1	480.998	1833	2314
456	0	15	10	10	1566.86	3465.38	1900.78	1	4	1	296.131	1698.87	1995
457	2	15	11	11	1566.86	4251.57	1989.11	3	5	2	922.696	1102.3	2025
458	1	13	8	8	1566.86	2183.85	1992.7	1	2	1	272.182	1297.82	1570
459	1	14	10	8	1566.86	1539.55	1954.27	1	1	1	305.267	1210.73	1516
460	1	13	10	9	1566.86	2170.77	1985.5	2	4	2	480.998	998.002	1479
461	1	13	9	7	1566.86	2316.45	1894.88	2	3	1	381.27	921.73	1303
462	0	11	8	7	1566.86	2692.15	1648	2	3	1	320.432	759.568	1080
463	0	11	4	5	953.786	2802.91	1495.5	2	3	1	401.969	378.031	780
464	5	17	9	10	953.786	2131.54	1231.6	3	3	1	444.958	857.042	1302
465	2	12	4	5	953.786	3753.08	1188.8	1	4	1	443.577	201.423	645
466	2	8	1	3	953.786	1765.38	1098.17	1	3	2	271.833	196.167	468
467	4	17	8	11	953.786	2680.77	1008.14	2	4	1	342.592	1048.41	1391
468	3	11	4	5	953.786	2867.51	1056	1	3	1	377.932	229.068	607
469	3	13	5	7	953.786	2550	1006.11	1	3	1	381.27	344.73	726
470	2	17	9	11	953.786	3060	978.1	2	4	1	298.498	1021.5	1320
471	6	19	13	13	953.786	2157.69	924.333	2	3	1	336.137	1350.86	1687
472	4	14	5	6	953.786	3459.63	1000.6	2	4	1	296.131	483.869	780
473	2	15	9	9	953.786	1778.46	906.5	2	3	1	438.014	812.986	1251
474	2	13	5	7	953.786	2563.08	920.75	2	4	1	342.592	557.408	900
475	2	17	10	10	953.786	3191.29	919.154	2	4	1	368.444	1035.56	1404
476	2	11	5	6	1091	2837.69	953.786	1	1	1	305.267	584.733	890
477	4	21	12	11	1091	3504.62	949.533	1	4	1	296.131	1421.87	1718
478	3	10	4	4	1091	2615.38	997.562	2	3	1	350.664	281.336	632
479	3	20	12	9	1091	2510.77	988.312	2	3	2	441.685	1141.31	1583
480	2	14	6	5	1091	2236.15	1005.88	2	3	2	336.137	473.863	810
481	2	15	6	6	1091	3962.31	1016.19	1	4	1	443.577	409.423	853
482	3	19	9	5	1091	2484.62	1070.77	1	3	1	381.27	1062.73	1444
483	3	11	3	4	1091	1556.15	1080.31	1	1	1	305.267	314.733	620
484	2	17	7	4	1091	2013.58	1047.43	2	3	1	444.958	695.042	1140
485	2	13	5	3	1091	2419.23	1103.75	2	2	1	272.182	567.818	840
486	0	18	7	3	1091	2785.38	1103.75	2	3	1	320.432	879.568	1200
487	0	18	8	2	1091	2278.78	1079.54	2	3	1	336.137	923.863	1260
488	0	19	9	2	1091	2393.08	1107.23	2	3	1	381.27	811.73	1193
489	2	20	10	4	1192.36	3268.97	1107.75	2	4	1	368.444	952.556	1321
490	2	19	9	3	1192.36	2523.85	1124.15	2	3	1	381.27	807.73	1189
491	2	17	6	2	1192.36	2785.38	1121.08	1	1	1	305.267	588.733	894
492	0	18	9	4	1192.36	3910	1103.62	1	4	1	443.577	637.423	1081
493	4	20	13	7	1192.36	2468.79	1065	2	3	2	350.664	1287.34	1638
494	2	17	10	6	1192.36	3896.92	1105.93	1	4	1	443.577	771.423	1215
495	3	17	11	7	1192.36	2159.78	1134.86	2	3	1	388.606	841.394	1230
496	3	15	8	6	1192.36	2777.15	1141.2	2	3	1	401.969	651.031	1053
497	1	18	12	7	1192.36	3713.85	1135.69	2	4	1	443.577	1069.42	1513
498	5	13	5	4	1192.36	2288.46	1176.94	1	2	1	272.182	361.818	634
499	1	20	11	6	1192.36	3338.54	1126.31	2	4	1	298.498	1141.5	1440
500	1	17	10	5	1192.36	2066.15	1144.76	2	3	1	388.606	871.394	1260
501	0	18	10	4	1192.36	2265.97	1185.06	2	3	1	336.137	907.863	1244
502	0	17	8	3	1192.36	2445.38	1208.62	1	4	1	443.577	537.423	981
503	4	21	10	7	1258.31	2249.23	1181.92	2	3	1	388.606	1177.39	1566
504	1	14	6	3	1258.31	1974.62	1211.46	1	2	1	285.463	436.537	722
505	4	22	10	9	1258.31	2545.42	1168.91	1	3	1	320.432	1245.57	1566
506	2	14	5	4	1258.31	2798.46	1202	1	1	1	305.267	334.733	640
507	3	18	8	7	1258.31	2316.45	1154.08	2	3	1	381.27	813.73	1195
508	3	23	11	11	1258.31	2210	1157.23	2	3	1	388.606	1332.39	1721
509	3	23	10	10	1258.31	3295.38	1197.5	2	4	1	298.498	1321.5	1620
510	5	11	3	2	1258.31	3073.08	1215.75	1	4	1	368.444	101.556	470
511	5	12	4	3	1258.31	3504.62	1158.38	2	4	1	480.998	59.0024	540
512	0	22	8	8	1258.31	2615.38	1127.08	1	3	1	350.664	1012.34	1363
513	2	25	11	10	1258.31	2615.38	1135.67	2	3	1	350.664	1329.34	1680
514	2	22	8	8	1258.31	4184.62	1177.54	1	4	1	542.141	830.859	1373
515	1	23	9	7	1258.31	2667.69	1187.46	2	3	2	230.966	1209.03	1440
516	3	19	6	5	1258.31	1739.23	1205.5	2	2	1	285.463	724.537	1010
517	2	25	12	8	1258.31	1830.77	1192.47	2	3	1	438.014	1239.99	1678
518	1	24	10	8	1258.31	2157.69	1222.81	2	3	1	336.137	1212.86	1549
519	1	24	11	7	1637.38	4053.85	1237.8	1	4	1	542.141	811.859	1354
520	2	22	9	7	1637.38	3033.85	1245.06	1	3	1	320.432	830.568	1151
521	0	25	12	8	1637.38	3530.77	1239.53	1	4	2	396.029	1089.97	1486
522	12	39	24	21	1637.38	2066.15	1253.22	2	2	1	272.182	2847.82	3120
523	8	32	19	15	1637.38	2944.4	1386.44	2	3	1	401.969	1818.03	2220
524	4	25	12	9	1637.38	2802.91	1468.82	2	3	1	401.969	1108.03	1510
525	4	23	11	7	1637.38	2574.19	1472.75	1	3	1	350.664	986.336	1337
526	4	22	10	6	1637.38	2301.54	1464.76	1	3	1	336.137	810.863	1147
527	2	23	11	9	1637.38	2545.29	1436.94	1	3	1	320.432	1110.57	1431
528	2	23	12	10	1637.38	2981.54	1436.61	2	3	2	377.932	1152.07	1530
529	2	25	12	10	1637.38	2118.46	1551.71	2	3	1	388.606	1139.39	1528
530	2	25	12	10	1637.38	3504.62	1550.39	2	4	1	296.131	1263.87	1560
531	2	30	14	12	1637.38	3465.38	1554.35	2	4	1	296.131	1419.87	1716
532	2	25	11	11	1637.38	2772.31	1574.53	2	3	1	230.966	1111.03	1342
533	2	28	13	15	1637.38	2798.33	1568.76	2	3	1	377.932	1414.07	1792
534	1	29	14	14	1637.38	3583.08	1614.93	2	4	1	410.583	1563.42	1974
535	3	24	9	11	1575.12	3452.31	1637.38	1	4	1	396.029	736.971	1133
536	3	29	15	11	1575.12	4276.15	1607.71	2	4	1	542.141	1377.86	1920
537	3	29	14	11	1575.12	2615.38	1625.06	2	3	1	350.664	1499.34	1850
538	2	26	13	9	1575.12	3556.92	1555	2	4	2	396.029	1266.97	1663
539	3	23	9	7	1575.12	3020.77	1562.2	2	4	1	368.444	930.556	1299
540	1	27	14	9	1575.12	2692.15	1548.13	2	3	1	320.432	1369.57	1690
541	5	28	18	13	1575.12	3811.4	1602	2	4	1	595.125	1453.87	2049
542	3	25	14	10	1575.12	2536.92	1631.8	2	3	1	350.664	1322.34	1673
543	3	24	12	9	1575.12	2842.53	1656.36	2	3	1	401.969	1158.03	1560
544	3	27	17	11	1575.12	3465.38	1649.93	2	4	1	296.131	1663.87	1960
545	4	25	14	9	1575.12	2265.97	1687.21	2	3	1	336.137	1253.86	1590
546	9	21	6	4	1575.12	1900.99	1680.73	1	2	1	285.463	544.537	830
547	1	26	17	11	1575.12	2545.42	1627.56	2	3	1	320.432	1513.57	1834
548	4	22	11	6	1575.12	1686.92	1654.47	2	2	1	285.463	898.537	1184
549	2	26	17	10	1575.12	2641.54	1613.93	2	3	1	320.432	1307.57	1628
550	1	22	13	8	1575.12	3556.92	1590.87	1	4	1	396.029	942.971	1339
551	4	25	18	14	1208.3	3727.58	1575.12	2	4	1	595.125	1260.87	1856
552	2	23	15	11	1208.3	2576.15	1591.65	1	3	1	441.685	973.315	1415
553	3	20	12	8	1208.3	1909.23	1588.75	2	3	2	271.833	866.167	1138
554	2	19	13	10	1208.3	2550	1544.25	2	3	1	381.27	890.73	1272
555	2	16	9	5	1208.3	4137.02	1467.17	1	4	1	542.141	290.859	833
556	5	18	16	14	1208.3	1935.38	1406.58	1	3	1	444.958	1236.04	1681
557	4	16	12	12	1208.3	3665.85	1383.33	2	4	2	410.583	919.417	1330
558	2	14	8	7	1208.3	3459.63	1361.67	2	4	1	296.131	603.869	900
559	2	12	6	6	1208.3	2249.23	1325.09	2	3	1	388.606	447.394	836
560	2	12	7	6	1208.3	3060	1284.33	1	4	1	298.498	523.502	822
561	2	11	8	9	706.75	4276.15	1208.3	2	4	1	542.141	535.859	1078
562	2	10	7	7	706.75	2510.77	1196.45	2	3	1	320.432	579.568	900
563	3	6	3	5	706.75	2907.52	1072.44	1	3	1	401.969	65.0311	467
564	0	5	2	4	706.75	2937.6	1001.75	1	3	1	401.969	131.031	533
565	4	12	7	8	706.75	2468.79	949.667	2	3	2	350.664	861.336	1212
566	1	6	2	4	706.75	2432.31	897.556	1	3	2	441.685	80.3148	522
567	3	10	4	5	706.75	2118.46	807.778	2	3	1	388.606	455.394	844
568	2	6	1	2	706.75	1935.38	797.25	1	2	1	285.463	69.5372	355
569	2	10	6	5	706.75	2746.15	696.556	1	1	1	305.267	495.733	801
570	3	13	8	5	706.75	2545.29	707	2	3	1	320.432	637.568	958
571	2	8	3	3	706.75	2066.15	729.818	1	3	1	388.606	64.3941	453
572	2	7	3	3	915.8	2942.31	706.75	2	4	1	368.444	171.556	540
573	1	10	5	5	915.8	2159.78	661.917	2	3	1	388.606	371.394	760
574	1	13	6	2	915.8	2228.96	666.909	2	3	1	388.606	471.394	860
575	2	14	6	4	915.8	2523.85	683	2	3	1	381.27	638.73	1020
576	2	7	2	1	915.8	3831.54	708.923	1	4	1	443.577	17.4228	461
577	1	13	5	3	915.8	2944.4	691.214	2	3	1	401.969	425.031	827
578	2	12	3	2	915.8	2278.78	700.267	2	3	1	336.137	263.863	600
579	1	13	6	4	915.8	2785.38	668.5	2	3	1	320.432	760.568	1081
580	3	13	8	6	915.8	2777.15	708.429	2	3	2	401.969	756.031	1158
581	7	17	13	10	915.8	2615.38	730.857	2	3	1	350.664	1569.34	1920
582	4	13	7	5	915.8	3295.38	810.133	2	4	1	298.498	740.502	1039
583	3	12	8	5	915.8	2236.15	824.438	2	2	2	272.182	896.818	1169
584	4	11	5	3	915.8	2210	825.833	2	3	1	388.606	445.394	834
585	1	11	8	5	915.8	2545.42	881.529	1	3	1	381.27	581.73	963
586	1	10	6	4	731.5	2615.38	956.692	2	3	1	350.664	317.336	668
587	1	10	5	3	731.5	2353.85	936.071	2	2	2	272.182	507.818	780
588	1	6	4	4	731.5	2236.15	962	2	3	2	336.137	374.863	711
589	1	6	3	3	731.5	2802.91	952.333	2	3	1	401.969	240.031	642
590	0	6	4	5	731.5	2157.69	955.833	2	3	1	336.137	383.863	720
591	0	8	5	8	731.5	3465.38	925.75	2	4	1	296.131	714.869	1011
592	0	6	2	5	731.5	3811.4	755.333	2	4	1	595.125	64.8745	660
593	1	7	3	5	731.5	2157.69	741.714	2	3	1	336.137	323.863	660
594	1	7	2	3	676	2576.15	731.5	2	4	1	342.592	77.4078	420
595	3	11	6	7	676	2393.08	700.5	2	3	1	381.27	664.73	1046
596	1	6	3	4	676	3452.31	733.75	1	4	1	396.029	107.971	504
597	2	8	4	5	676	1765.38	708.222	2	3	2	271.833	368.167	640
598	2	5	2	4	676	2842.53	701.4	1	3	1	401.969	20.0311	422
599	1	8	5	7	676	2981.54	676	2	3	2	377.932	540.068	918
600	1	6	2	4	676	2265.97	697.889	2	3	1	336.137	263.863	600
601	1	8	5	7	676	2772.31	652.222	2	3	1	230.966	650.034	881
602	1	8	5	7	676	3190.77	675.1	2	4	2	368.444	519.556	888
603	2	6	3	4	676	3724.7	694.455	1	4	2	410.583	115.417	526
604	0	7	3	4	676	3033.85	682.273	1	3	1	320.432	270.568	591
605	1	9	4	5	905.909	2576.15	676	2	3	2	441.685	482.315	924
606	1	9	4	4	905.909	2301.54	721.818	2	3	1	532.915	405.085	938
607	2	6	1	1	905.909	2692.15	712	1	3	1	320.432	65.5676	386
608	0	8	4	4	905.909	2118.46	701.273	2	3	1	388.606	465.394	854
609	1	10	5	6	905.909	3530.77	750.6	2	4	2	396.029	576.971	973
610	1	10	6	6	905.909	2236.15	756.1	2	3	1	444.958	496.042	941
611	11	21	16	14	905.909	3674.62	772.909	2	4	2	595.125	1894.87	2490
612	2	8	3	3	905.909	2228.96	931.444	2	3	1	388.606	331.394	720
613	2	6	2	3	905.909	3504.62	910.3	1	4	1	296.131	258.869	555
614	1	11	4	3	905.909	2545.42	878	2	3	1	320.432	577.568	898
615	1	10	3	2	806	2210	905.909	2	3	1	388.606	271.394	660
616	1	10	3	3	806	2574.19	881.909	2	3	1	350.664	301.336	652
617	2	12	5	4	806	2484.62	855.909	2	3	1	381.27	474.73	856
618	2	11	5	5	806	2907.52	855.917	2	3	1	401.969	438.031	840
619	3	9	3	4	806	2615.38	854.692	2	3	1	350.664	264.336	615
620	2	13	7	6	806	3338.54	873.833	2	4	1	298.498	603.502	902
621	2	14	9	7	806	3556.92	867.917	2	4	2	396.029	724.971	1121
622	3	10	4	2	806	2641.54	882.917	1	3	1	320.432	138.568	459
623	1	13	7	6	806	2249.23	752.545	2	3	1	388.606	471.394	860
624	2	10	5	4	806	4066.92	761.5	1	4	1	443.577	158.423	602
625	1	12	7	6	806	3727.58	749.231	2	4	2	595.125	437.875	1033
626	1	11	5	5	806	2523.85	773.308	2	3	1	381.27	364.73	746
627	0	12	5	4	806	2210	778.833	2	2	2	272.182	726.818	999
628	0	11	5	3	806	2536.92	795.769	2	3	1	350.664	588.336	939
629	2	12	7	4	849.667	1778.46	806	2	2	2	285.463	860.537	1146
630	1	11	5	3	849.667	2316.45	840.714	2	3	1	381.27	511.73	893
631	1	11	7	4	849.667	3590.79	844.2	2	4	2	480.998	659.002	1140
632	2	8	3	3	849.667	2510.77	903.455	1	3	1	320.432	263.568	584
633	0	10	6	5	849.667	2157.69	876.833	2	3	1	381.27	480.73	862
634	0	10	7	6	849.667	2301.54	875.692	2	3	1	336.137	626.863	963
635	1	9	7	5	849.667	2066.15	897.25	2	3	1	388.606	564.394	953
636	1	6	4	4	849.667	2944.4	932.545	1	3	1	401.969	155.031	557
637	0	6	4	3	849.667	3556.92	903.6	1	4	2	396.029	152.971	549
638	0	4	2	4	843.727	2550	849.667	2	3	1	381.27	314.73	696
639	0	5	2	5	843.727	2236.15	737.714	2	3	1	336.137	503.863	840
640	1	10	3	8	843.727	2667.69	774.286	2	3	2	230.966	819.034	1050
641	0	9	3	7	843.727	1858.62	713.143	2	3	1	271.833	633.167	905
642	0	8	3	6	843.727	2157.69	706.286	2	3	1	336.137	420.863	757
643	1	9	4	6	843.727	2785.38	734.857	2	3	1	320.432	567.568	888
644	1	8	3	4	843.727	2615.38	754	2	3	1	350.664	249.336	600
645	2	12	7	6	843.727	2278.78	736.889	2	3	1	336.137	857.863	1194
646	1	12	5	6	843.727	3459.63	808.556	1	4	1	296.131	584.869	881
647	1	13	8	5	843.727	3465.38	815.8	2	4	1	296.131	826.869	1123
648	2	9	3	3	770	2692.15	858.5	1	3	1	320.432	326.568	647
649	0	9	5	3	770	3465.38	839.2	1	4	1	296.131	441.869	738
650	1	9	6	3	770	2545.29	830	2	3	1	320.432	459.568	780
651	1	9	7	4	770	2159.78	825.833	2	3	1	388.606	609.394	998
652	2	8	5	1	770	2393.08	839.077	2	3	1	381.27	248.73	630
653	0	6	5	4	770	3295.38	839.636	2	4	1	298.498	474.502	773
654	0	6	3	4	770	2937.6	841.091	2	3	1	401.969	319.031	721
655	3	8	4	7	770	3504.62	755.286	2	4	2	480.998	502.002	983
656	2	7	2	4	770	2802.91	783.75	2	3	1	401.969	258.031	660
657	2	5	1	4	722.769	2615.38	770	2	3	1	350.664	129.336	480
658	4	13	7	6	722.769	2798.33	753.125	2	3	2	377.932	762.068	1140
659	4	10	6	5	722.769	2510.77	796.111	2	3	1	320.432	630.568	951
660	2	7	3	4	722.769	3060	750.125	1	4	1	298.498	200.502	499
661	2	7	3	3	722.769	2053.08	722.222	1	3	1	465.192	99.8082	565
662	2	12	6	4	722.769	2210	699.111	2	3	1	388.606	660.394	1049
663	1	8	3	1	722.769	2545.42	734.1	1	3	1	381.27	166.73	548
664	2	12	6	4	722.769	2842.53	716.8	2	3	1	401.969	529.031	931
665	2	9	2	1	722.769	1778.46	736.273	1	3	1	438.014	146.986	585
666	1	11	6	4	722.769	2118.46	723.667	2	3	1	388.606	634.394	1023
667	2	9	4	2	722.769	3724.7	746.692	1	4	2	410.583	263.417	674
668	0	9	4	3	722.769	3779.23	728.167	2	4	2	443.577	214.423	658
669	0	11	6	5	769.111	2013.85	743	2	3	1	444.958	287.042	732
670	0	12	7	6	769.111	2468.79	742.154	2	3	2	350.664	565.336	916
671	4	11	9	9	769.111	3556.92	724.923	2	4	2	396.029	901.971	1298
672	1	9	5	5	769.111	3504.62	765.857	1	4	1	296.131	491.869	788
673	1	8	5	5	769.111	3583.08	789.692	2	4	1	410.583	316.417	727
674	1	7	4	5	769.111	2536.92	807.231	2	3	1	350.664	369.336	720
675	1	6	4	4	769.111	2523.85	819.154	1	3	1	381.27	219.73	601
676	0	4	3	3	769.111	2236.15	792.909	1	3	2	336.137	69.8631	406
677	0	4	2	6	769.111	2265.97	760.667	2	3	1	336.137	397.863	734
678	0	3	1	3	873	2545.42	753.429	1	3	1	320.432	213.568	534
679	2	10	4	14	873	2301.54	726	2	3	1	336.137	1403.86	1740
680	1	4	1	5	873	2615.38	789.167	2	3	1	350.664	309.336	660
681	1	4	1	5	873	2907.52	779.167	2	3	1	401.969	318.031	720
682	1	10	4	9	873	3665.85	799	2	4	2	410.583	638.417	1049
683	1	13	4	8	873	2641.54	906.167	2	3	1	320.432	669.568	990
684	2	7	1	3	873	2484.62	948.833	1	3	1	381.27	36.7296	418
685	3	14	7	12	1014.43	2550	873	2	3	1	381.27	902.73	1284
686	2	12	5	9	1014.43	2615.38	924.375	2	3	1	350.664	669.336	1020
687	2	12	6	9	1014.43	2772.31	935	2	3	2	230.966	849.034	1080
688	3	11	3	3	1014.43	2249.23	995.667	1	3	1	388.606	162.394	551
689	1	12	7	10	1014.43	3811.4	863.556	2	4	1	595.125	548.875	1144
690	1	11	5	9	1014.43	2278.78	891.6	2	3	1	336.137	623.863	960
691	0	12	7	10	1014.43	3910	897.818	2	4	1	443.577	666.423	1110
692	2	14	10	12	1014.43	2545.42	915.5	2	3	1	381.27	1065.73	1447
693	1	14	8	9	1014.43	2066.15	981.083	2	3	1	388.606	718.394	1107
694	1	11	7	5	1014.43	2574.19	1010.09	2	3	1	350.664	531.336	882
695	2	10	5	5	1014.43	3583.08	999.417	1	4	1	480.998	202.002	683
696	1	14	6	5	1014.43	2510.77	973.833	2	3	1	320.432	724.568	1045
697	1	13	6	5	1014.43	2170.77	1026.08	4	4	2	480.998	628.002	1109
698	2	11	4	3	1014.43	2937.6	1032.46	2	3	1	401.969	378.031	780
699	1	10	5	5	927.778	2615.38	1026.7	2	3	1	350.664	552.336	903
700	1	10	5	5	927.778	3459.63	929.857	1	4	1	296.131	488.869	785
701	2	9	3	4	927.778	2159.78	911.75	1	3	1	388.606	214.394	603
702	1	11	7	8	927.778	3338.54	877.444	2	4	1	298.498	820.502	1119
703	1	10	6	5	927.778	2545.29	878.778	1	3	1	320.432	425.568	746
704	1	10	8	9	927.778	3465.38	865.5	2	4	1	296.131	924.869	1221
705	1	10	7	8	927.778	2867.51	897.818	2	3	1	377.932	646.068	1024
706	0	6	5	7	927.778	3295.38	908.333	2	4	1	298.498	721.502	1020
707	0	8	4	5	927.778	3713.85	941.364	2	4	1	443.577	485.423	929
708	1	8	2	5	824.778	1713.08	930.875	2	2	2	285.463	639.537	925
709	1	6	1	1	824.778	3465.38	930.222	1	4	1	296.131	113.869	410
710	0	9	3	5	824.778	2157.69	896.429	2	3	1	336.137	538.863	875
711	0	9	4	6	824.778	2210	893.75	2	3	1	388.606	513.394	902
712	1	8	5	7	824.778	4393.85	913.25	2	4	1	542.141	537.859	1080
713	1	8	4	6	824.778	3674.62	877.286	2	4	2	595.125	231.875	827
714	0	9	5	7	824.778	2157.69	871	2	3	1	381.27	438.73	820
715	1	11	7	6	824.778	2157.69	846	2	3	1	336.137	536.863	873
716	1	8	5	5	824.778	3452.31	849	1	4	1	396.029	314.971	711
717	2	11	5	7	985.615	3727.58	824.778	2	4	2	595.125	468.875	1064
718	2	8	4	4	985.615	1830.77	848.7	2	3	1	438.014	281.986	720
719	0	10	4	6	985.615	2536.92	791.833	2	3	1	350.664	586.336	937
720	1	10	5	7	985.615	3556.92	803	2	4	2	396.029	719.971	1116
721	3	12	7	10	985.615	3665.85	818.111	2	4	2	410.583	1061.42	1472
722	2	7	2	4	985.615	2944.4	883.5	1	3	1	401.969	191.031	593
723	2	10	5	7	985.615	2981.54	860.1	2	3	2	377.932	706.068	1084
724	2	10	4	4	985.615	3033.85	880.455	1	3	1	320.432	433.568	754
725	1	10	7	11	985.615	4289.23	874.455	2	4	2	542.141	909.859	1452
726	1	8	4	7	985.615	3504.62	948.7	2	4	1	296.131	651.869	948
727	1	8	6	9	985.615	3530.77	948.636	2	4	2	396.029	854.971	1251
728	1	8	5	8	985.615	2777.15	973.833	2	3	2	401.969	725.031	1127
729	2	12	7	8	1199.44	2907.52	1088.56	2	3	1	401.969	935.031	1337
730	3	10	5	11	1199.44	3338.54	892.667	2	4	1	298.498	1570.5	1869
731	3	10	4	8	1199.44	3112.31	1032.14	2	4	2	368.444	981.556	1350
732	3	10	3	7	1199.44	2615.38	1071.88	2	3	1	532.915	487.085	1020
733	3	8	1	3	1199.44	2798.33	1080.88	1	3	1	377.932	198.068	576
734	1	9	6	10	1199.44	2183.85	977.857	1	3	1	465.192	1470.81	1936
735	1	9	6	10	1199.44	2785.38	1097.62	2	3	1	320.432	1693.57	2014
736	2	10	8	10	1670	2079.23	1199.44	2	3	1	444.958	1603.04	2048
737	3	8	4	6	1670	2802.91	1284.3	1	3	1	401.969	824.031	1226
738	1	8	6	8	1670	3060	1273.2	1	4	1	298.498	1437.5	1736
739	5	19	13	13	1156.15	3811.4	1113	2	4	1	595.125	1125.87	1721
740	4	18	11	11	1156.15	2316.45	1149.92	2	3	1	381.27	1022.73	1404
741	2	16	8	11	1156.15	2053.08	1154	2	3	1	465.192	722.808	1188
742	2	17	9	11	1156.15	3452.31	1156.12	2	4	1	396.029	854.971	1251
743	1	11	5	4	844.2	2842.53	1159.58	2	3	1	401.969	331.031	733
744	1	12	7	5	844.2	2118.46	1071.73	2	3	1	388.606	537.394	926
745	3	12	9	7	844.2	4066.92	1059.58	3	5	2	922.696	173.304	1096
746	2	11	7	5	844.2	3338.54	1062.38	2	4	1	298.498	521.502	820
747	3	11	5	3	844.2	2692.15	1045.07	1	3	1	320.432	246.568	567
748	3	12	11	12	844.2	2981.54	1016.79	2	3	2	377.932	1201.07	1579
749	1	6	5	10	844.2	2536.92	870.25	2	3	1	350.664	758.336	1109
750	0	2	1	6	846.5	2867.51	860	1	3	1	377.932	127.068	505
751	0	3	1	9	846.5	2937.6	645.2	1	3	1	401.969	384.031	786
752	0	5	1	8	846.5	3060	554	2	4	1	298.498	573.502	872
753	1	9	3	9	846.5	4123.42	633.5	2	5	1	922.696	300.304	1223
754	2	10	4	9	1004.5	3181.88	846.5	2	4	2	368.444	809.556	1178
755	2	8	3	8	1004.5	4306.75	912.8	3	5	2	922.696	60.3042	983
756	0	9	4	7	1004.5	2228.96	885	2	3	1	388.606	458.394	847
757	0	9	4	8	1004.5	3664.81	879.571	2	4	1	480.998	628.002	1109
758	1	10	6	9	1004.5	3896.92	908.25	3	5	1	922.696	331.304	1254
759	1	10	5	8	1004.5	2301.54	966.75	2	4	1	595.125	447.875	1043
760	1	9	6	8	1004.5	4184.62	975.222	3	5	1	922.696	332.304	1255
761	1	8	5	5	1004.5	3190.77	1003.2	2	4	2	368.444	506.556	875
762	0	8	5	8	1004.5	2667.69	1003.5	2	3	2	230.966	1002.03	1233
763	0	7	5	7	930.6	4236.92	1004.5	3	5	1	922.696	76.3042	999
764	1	5	4	8	930.6	4106.15	1076.88	3	5	1	922.696	65.3042	988
765	1	4	2	6	930.6	2118.46	1092.43	2	3	1	388.606	337.394	726
766	1	4	3	4	1263.67	4014.62	902	4	4	2	443.577	1340.42	1784
767	1	2	0	4	1263.67	3896.92	1122.5	3	5	1	922.696	272.304	1195
768	2	8	3	3	1124.67	4055.94	1003.5	3	5	1	922.696	345.304	1268
769	1	5	0	3	1124.67	2301.54	1091.67	2	3	1	532.915	459.085	992
770	1	5	1	2	1124.67	3811.4	1024	2	4	1	595.125	396.875	992
771	0	7	3	2	1124.67	4306.75	1016	3	5	1	922.696	259.304	1182
772	4	14	8	2	1124.67	3724.7	1049.2	2	4	2	410.583	993.417	1404
773	2	11	5	0	1124.67	2842.53	1167.6	2	3	1	401.969	508.031	910
774	3	12	5	1	876.692	2545.42	1124.67	2	3	1	320.432	630.568	951
775	3	12	4	1	876.692	2728.76	1099.86	2	3	1	532.915	339.085	872
776	2	14	7	2	876.692	2301.54	983.667	2	4	1	595.125	487.875	1083
777	1	11	5	2	876.692	2265.97	993.6	2	3	1	336.137	402.863	739
778	1	11	5	2	876.692	2066.15	970.455	2	3	1	388.606	429.394	818
779	1	12	7	2	876.692	3452.31	882.375	2	4	1	396.029	536.971	933
780	1	12	8	2	876.692	2236.15	888	2	3	1	444.958	586.042	1031
781	2	12	6	1	876.692	2053.08	902.3	2	3	1	465.192	297.808	763
782	0	11	6	2	876.692	2944.4	889.636	2	3	1	401.969	409.031	811
783	0	11	6	4	876.692	2393.08	883.083	2	3	1	381.27	517.73	899
784	0	12	6	4	876.692	1830.77	884.308	2	3	1	438.014	496.986	935
785	1	18	8	4	876.692	4106.15	887.929	3	5	2	922.696	357.304	1280
786	1	14	5	3	815.929	2510.77	870.364	2	3	1	441.685	555.315	997
787	2	10	3	2	815.929	2066.15	880.917	2	2	1	272.182	327.818	600
788	2	13	7	1	815.929	4236.92	907.417	3	5	1	922.696	65.3042	988
789	2	12	4	1	815.929	1896.15	894.923	2	3	1	444.958	330.042	775
790	0	13	6	1	815.929	2316.45	904.333	2	3	1	381.27	379.73	761
791	0	13	7	1	815.929	2545.29	893.308	2	3	1	320.432	489.568	810
792	0	13	8	1	815.929	2615.38	883	2	3	1	350.664	489.336	840
793	0	13	9	1	815.929	2278.78	873.692	2	3	1	336.137	460.863	797
794	0	14	10	2	815.929	4066.92	868.214	2	4	1	443.577	548.423	992
795	2	12	8	1	815.929	3033.85	879.769	2	3	1	320.432	579.568	900
796	2	8	4	1	815.929	2536.92	839.846	1	3	1	350.664	154.336	505
797	2	11	6	0	736.375	3465.38	815.929	1	4	1	296.131	472.869	769
798	2	11	6	0	736.375	2249.23	815	2	3	1	388.606	488.394	877
799	2	6	2	0	736.375	2574.19	819.429	1	3	1	350.664	21.3357	372
800	3	15	7	2	736.375	2013.85	733.077	2	3	1	444.958	689.042	1134
801	1	8	4	0	736.375	2079.23	761.714	1	3	1	444.958	130.042	575
802	2	10	4	1	736.375	1530	743.692	2	3	1	438.014	182.986	621
803	2	13	7	2	736.375	3727.58	728.231	2	4	2	595.125	462.875	1058
804	2	12	6	3	736.375	3583.08	680.417	2	4	1	410.583	534.417	945
805	5	12	9	3	736.375	3713.85	700.769	1	4	1	443.577	733.423	1177
806	3	9	2	1	736.375	2615.38	734.786	1	3	1	350.664	45.3357	396
807	4	14	10	3	736.375	2667.69	712.2	2	3	2	230.966	1117.03	1348
808	3	10	5	2	736.375	1739.23	738.214	2	3	1	438.014	353.986	792
809	4	10	7	2	736.375	3556.92	758.714	1	4	2	396.029	392.971	789
810	5	9	3	1	736.375	2288.46	760.733	1	2	1	272.182	98.8183	371
811	0	12	6	2	718	4393.85	697.267	1	4	1	542.141	306.859	849
812	0	10	3	1	718	3504.62	744.833	2	4	1	480.998	119.002	600
813	1	9	4	2	718	3181.88	733.692	1	4	1	368.444	289.556	658
814	4	12	8	4	718	3665.85	709.75	2	4	2	410.583	751.417	1162
815	3	13	8	4	718	2680.77	755.231	2	4	1	342.592	797.408	1140
816	2	9	4	2	718	3661.54	782.714	1	4	1	443.577	195.423	639
817	2	9	4	2	718	3439.23	773.133	1	4	1	480.998	109.002	590
818	2	10	5	3	718	2236.15	749.467	1	3	2	336.137	350.863	687
819	0	9	5	3	718	2563.08	684.667	2	4	1	342.592	377.408	720
820	0	8	5	5	718	3060	706.909	2	4	1	298.498	541.502	840
821	1	11	6	6	1192.4	928.462	718	2	5	1	492.098	568.902	1061
822	1	8	3	5	1192.4	2079.23	773.182	2	2	1	272.182	507.818	780
823	0	9	4	7	1192.4	3338.54	773.182	2	4	1	298.498	661.502	960
824	1	10	4	6	1192.4	601.538	817	2	2	1	492.098	312.902	805
825	1	9	3	4	1192.4	1909.23	816	2	2	1	285.463	374.537	660
826	3	14	8	8	1192.4	2798.33	804	2	3	2	377.932	1012.07	1390
827	3	16	9	9	1192.4	3459.63	830.182	2	4	1	296.131	1083.87	1380
828	3	18	8	10	1192.4	2981.54	897.545	2	3	2	377.932	1494.07	1872
829	3	10	2	2	1192.4	2692.15	1046.8	1	3	1	320.432	279.568	600
830	2	16	6	9	1192.4	1778.46	1046.8	2	2	1	285.463	1514.54	1800
831	3	18	9	10	1192.4	2468.79	1072.33	2	3	2	350.664	1569.34	1920
832	6	8	2	3	1192.4	2576.15	1172.33	2	4	1	342.592	257.408	600
833	2	16	8	11	1192.4	4137.02	1172.33	2	4	1	542.141	1497.86	2040
834	2	17	7	8	1192.4	3465.38	1138	3	4	1	480.998	1175	1656
835	0	13	6	7	1597.75	2746.15	1257.08	1	1	1	305.267	1176.73	1482
836	1	15	8	7	1597.75	2523.85	1274.38	1	3	1	381.27	1232.73	1614
837	1	17	8	5	1597.75	2890	1393	1	1	1	305.267	1337.73	1643
838	1	17	8	5	1597.75	2907.52	1414.08	1	3	1	401.969	1137.03	1539
839	1	21	10	6	1597.75	2510.77	1423.69	1	3	1	320.432	1497.57	1818
840	2	23	12	6	1597.75	2550	1457.38	2	3	1	381.27	1478.73	1860
841	5	13	6	3	1597.75	2785.38	1456.46	1	1	1	305.267	522.733	828
842	2	23	12	7	1597.75	2159.78	1446.83	1	3	1	388.606	1609.39	1998
843	4	20	11	6	1267.93	2545.42	1597.75	2	3	1	381.27	1238.73	1620
844	3	15	4	2	1267.93	1556.15	1600.22	1	1	1	305.267	480.733	786
845	5	19	12	8	1267.93	4289.23	1518.8	2	4	1	542.141	1272.86	1815
846	4	18	8	4	1267.93	2937.6	1545.22	1	3	1	401.969	705.031	1107
847	3	18	10	6	1267.93	2615.38	1501.4	2	3	1	350.664	969.336	1320
848	3	18	11	6	1267.93	2228.96	1484.91	1	3	1	388.606	944.394	1333
849	6	15	5	4	1267.93	2419.23	1472.25	2	2	1	272.182	542.818	815
850	7	13	3	2	1267.93	2798.46	1421.69	1	1	1	305.267	196.733	502
851	0	19	11	8	1267.93	2118.46	1333.92	2	3	1	388.606	1153.39	1542
852	0	18	11	7	1267.93	2785.38	1293.83	2	3	1	320.432	1119.57	1440
853	1	18	12	8	1267.93	2576.15	1258.83	2	3	2	441.685	1058.31	1500
854	2	17	12	9	1267.93	1935.38	1252.73	2	2	1	285.463	1285.54	1571
855	2	15	9	8	1267.93	2157.69	1279.25	2	3	1	336.137	923.863	1260
856	1	15	9	7	1267.93	3504.62	1277.77	2	4	1	296.131	843.869	1140
857	0	15	7	4	1133.07	2471.54	1278.75	2	2	1	272.182	663.818	936
858	0	17	7	4	1133.07	1935.38	1205.5	2	3	1	444.958	436.042	881
859	0	18	8	5	1133.07	3138.46	1186.67	2	4	1	368.444	616.556	985
860	5	21	11	8	1133.07	3556.92	1250.56	2	4	2	396.029	1075.97	1472
861	1	14	5	4	1133.07	2867.51	1272.7	2	3	1	377.932	402.068	780
862	1	14	4	3	1133.07	3910	1169.44	1	4	1	443.577	320.423	764
863	1	17	5	5	1133.07	2340.77	1087.67	1	2	1	272.182	675.818	948
864	1	18	6	5	1133.07	2942.31	1073.7	1	4	1	368.444	608.556	977
865	4	20	12	9	1133.07	3811.4	1064.91	2	4	1	595.125	800.875	1396
866	4	19	10	6	1133.07	3465.38	1027.9	2	4	1	296.131	963.869	1260
867	4	18	9	6	1133.07	1909.23	1049	2	3	2	271.833	898.167	1170
868	4	18	8	5	1133.07	3753.08	1059.08	1	4	1	443.577	537.423	981
869	5	16	5	3	1133.07	1581.39	1053.08	1	1	1	305.267	366.733	672
870	1	18	10	7	1133.07	2183.85	1017.08	2	3	1	465.192	788.808	1254
871	9	26	19	15	1133.07	2236.15	1034	2	2	2	272.182	2247.82	2520
872	3	18	11	7	1045.92	2157.69	1133.07	2	3	1	381.27	770.73	1152
873	3	16	8	5	1045.92	3452.31	1134.25	1	4	1	396.029	430.971	827
874	2	18	11	7	1045.92	3033.85	1116.18	2	3	1	320.432	759.568	1080
875	3	19	13	9	1045.92	2301.54	1114.17	2	3	1	336.137	1204.86	1541
876	4	13	6	4	1045.92	2545.29	1147.78	1	3	1	320.432	318.568	639
877	2	13	7	5	1045.92	2777.15	1143.12	2	3	2	401.969	424.031	826
878	2	12	8	7	1045.92	1900.99	1125.44	2	2	1	285.463	974.537	1260
879	2	11	5	4	1045.92	3073.08	1133.35	2	4	1	368.444	471.556	840
880	3	19	10	11	1045.92	3191.29	1149.69	1	4	1	368.444	1338.56	1707
881	2	15	8	8	1045.92	2210	1195.31	2	2	2	272.182	942.818	1215
882	2	15	6	8	1045.92	2265.97	1108.7	2	3	1	336.137	743.863	1080
883	1	15	5	7	1072.12	1974.62	993.875	1	2	1	285.463	662.537	948
884	1	14	4	6	1072.12	2641.54	988.778	1	3	1	320.432	479.568	800
885	2	19	8	7	1072.12	2393.08	1006.67	2	3	1	381.27	832.73	1214
886	1	17	6	7	1072.12	2157.69	1027.4	2	3	1	336.137	683.863	1020
887	7	23	14	11	1072.12	3465.38	1026.73	2	4	1	296.131	1498.87	1795
888	3	17	8	6	1072.12	2013.58	1114.82	2	3	1	444.958	658.042	1103
889	3	17	7	6	1072.12	2545.42	1113.83	1	3	1	320.432	692.568	1013
890	4	18	11	8	1072.12	2210	1106.08	2	3	1	388.606	791.394	1180
891	3	16	8	5	1072.12	2667.69	1121.58	1	3	1	230.966	711.034	942
892	6	14	3	3	1072.12	2183.85	1107.77	2	2	1	272.182	267.818	540
893	2	15	7	4	1072.12	2159.78	1067.21	2	3	1	388.606	449.394	838
894	3	22	13	9	1072.12	2772.31	989	2	3	2	230.966	1389.03	1620
895	3	23	13	10	1072.12	2692.15	1034.07	2	3	1	320.432	1248.57	1569
896	3	19	10	6	1072.12	4550.77	1069.73	1	4	1	542.141	400.859	943
897	3	19	10	7	1072.12	4014.62	1061.81	2	4	1	443.577	696.423	1140
898	5	16	6	4	1072.12	1539.55	1066.41	1	1	1	305.267	183.733	489
899	1	19	10	8	1370.33	3727.58	1072.12	2	4	1	595.125	829.875	1425
900	1	14	6	7	1370.33	2746.15	1092.88	1	1	1	305.267	867.733	1173
901	1	17	8	7	1370.33	2510.77	1092.88	1	3	1	320.432	1032.57	1353
902	1	16	7	6	1370.33	2615.38	1110.79	2	3	1	350.664	796.336	1147
903	0	20	10	7	1370.33	2842.53	1121.26	1	3	1	401.969	1022.03	1424
904	1	21	10	7	1370.33	2278.78	1158.47	2	3	1	336.137	1163.86	1500
905	1	20	10	6	1370.33	2615.38	1152.2	2	3	1	350.664	1029.34	1380
906	2	16	7	3	1370.33	1858.62	1165.53	1	3	2	271.833	671.167	943
907	0	18	9	5	1370.33	3556.92	1210.29	2	4	2	396.029	790.971	1187
908	17	36	27	17	1370.33	3504.62	1235.21	2	4	1	480.998	2819	3300
909	2	19	9	6	1370.33	2615.38	1355.21	2	3	1	350.664	729.336	1080
910	2	17	8	4	1370.33	2615.38	1336.87	1	3	1	350.664	601.336	952
911	4	22	11	10	1370.33	3583.08	1334.85	2	4	1	410.583	1126.42	1537
912	2	17	7	6	1370.33	1765.38	1349.29	2	3	2	271.833	783.167	1055
913	3	18	9	7	1370.33	3459.63	1389.71	1	4	1	296.131	802.869	1099
914	3	15	5	5	1108.43	3665.85	1366.43	2	4	2	410.583	434.417	845
915	2	19	10	8	1108.43	2236.15	1331.67	2	3	1	336.137	905.863	1242
916	2	19	9	7	1108.43	2484.62	1326.06	2	3	1	381.27	736.73	1118
917	1	17	8	7	1108.43	2798.33	1326	2	3	1	377.932	688.068	1066
918	2	18	9	7	1108.43	2545.42	1292.62	2	3	1	381.27	829.73	1211
919	2	16	8	5	1108.43	3724.7	1286.79	1	4	2	410.583	620.417	1031
920	3	19	11	7	1108.43	3478.46	1261.86	2	4	1	595.125	775.875	1371
921	2	19	9	5	1108.43	2118.46	1292.43	2	3	1	388.606	636.394	1025
922	4	22	11	7	1108.43	2802.91	1274.6	2	3	1	401.969	1038.03	1440
923	3	18	9	6	1108.43	2550	1291.47	2	3	1	381.27	840.73	1222
924	4	16	7	4	1108.43	2944.4	1287.12	2	3	1	401.969	558.031	960
925	1	18	9	5	1108.43	3452.31	1158.71	2	4	1	396.029	794.971	1191
926	3	20	11	8	1108.43	2228.96	1143.5	2	3	1	388.606	840.394	1229
927	4	16	5	4	1108.43	2867.51	1150.08	1	3	1	377.932	189.068	567
928	2	17	9	6	970.071	2785.38	1128.69	1	3	1	320.432	656.568	977
929	2	16	8	5	970.071	2545.29	1117.86	1	3	1	320.432	523.568	844
930	5	18	13	10	970.071	3465.38	1087.23	2	4	1	296.131	1117.87	1414
931	2	16	9	7	970.071	2157.69	1110.57	2	3	1	336.137	683.863	1020
932	2	14	7	5	970.071	2798.46	1104.53	1	1	1	305.267	534.733	840
933	4	20	13	12	970.071	2157.69	1104.53	2	3	1	336.137	1223.86	1560
934	3	16	10	6	970.071	2159.78	1115.76	2	3	1	388.606	684.394	1073
935	3	15	10	7	970.071	3295.38	1115.53	1	4	1	298.498	668.502	967
936	4	10	4	3	970.071	2574.19	1093.14	2	3	1	350.664	172.336	523
937	1	15	9	9	970.071	3504.62	1017.08	2	4	1	296.131	831.869	1128
938	2	11	6	5	970.071	2545.42	1025.62	1	3	1	320.432	337.568	658
939	1	13	7	9	970.071	3033.85	984.615	2	3	1	320.432	578.568	899
940	1	9	4	7	970.071	1242.31	978.5	2	3	1	492.098	167.902	660
941	1	12	7	8	970.071	2523.85	957.267	2	3	1	381.27	636.73	1018
942	1	10	6	7	824.692	3811.4	969.538	2	4	1	595.125	381.875	977
943	2	10	4	5	824.692	3556.92	970.071	1	4	2	396.029	271.971	668
944	1	14	8	8	824.692	2157.69	957.5	2	3	1	381.27	758.73	1140
945	1	9	4	4	824.692	3282.31	863.8	2	4	1	368.444	291.556	660
946	0	12	6	5	824.692	3530.77	845.273	1	4	2	396.029	478.971	875
947	0	12	6	6	824.692	2210	836.909	2	3	1	388.606	494.394	883
948	4	12	8	6	824.692	2907.52	869.636	2	3	1	401.969	790.031	1192
949	1	9	4	3	824.692	3583.08	875.455	2	4	1	480.998	59.0024	540
950	3	11	6	5	824.692	1909.23	864.727	2	3	2	271.833	688.167	960
951	2	12	8	6	824.692	3727.58	872.667	2	4	2	595.125	526.875	1122
952	3	8	3	3	824.692	2170.77	860.357	1	4	1	480.998	15.0024	496
953	0	9	5	3	824.692	2468.79	830.333	2	3	2	350.664	406.336	757
954	0	10	5	5	747.667	2777.15	824.692	2	3	2	401.969	433.031	835
955	0	10	5	5	747.667	2278.78	797.364	2	3	1	336.137	563.863	900
956	1	10	5	5	747.667	2265.97	813.6	2	3	1	336.137	388.863	725
957	2	9	6	6	747.667	2615.38	805.545	2	3	1	350.664	501.336	852
958	2	8	4	5	747.667	2937.6	809.417	1	3	1	401.969	314.031	716
959	3	8	2	3	747.667	3060	795.5	1	4	1	298.498	128.502	427
960	1	7	6	4	747.667	2981.54	767.154	2	3	1	377.932	462.068	840
961	1	8	6	4	747.667	2667.69	772.357	2	3	2	230.966	669.034	900
962	2	6	4	2	747.667	2641.54	767.769	1	3	1	320.432	213.568	534
963	0	7	1	3	957.571	2536.92	747.667	2	3	1	350.664	489.336	840
964	2	12	4	5	957.571	2772.31	748.222	2	3	2	230.966	943.034	1174
965	4	13	6	9	957.571	3556.92	778.667	2	4	2	396.029	1041.97	1438
966	2	6	1	2	957.571	3831.54	844.6	1	4	1	443.577	261.423	705
967	2	9	2	2	957.571	2545.29	831.909	2	3	1	320.432	358.568	679
968	2	13	7	9	957.571	2301.54	819.167	2	3	1	336.137	949.863	1286
969	2	12	4	6	957.571	2944.4	865.917	2	3	1	401.969	401.031	803
970	3	16	8	8	957.571	2867.51	928.778	2	3	1	377.932	762.068	1140
971	3	17	9	9	957.571	3674.62	949.9	2	4	2	595.125	631.875	1227
972	3	11	6	7	957.571	2615.38	975.091	2	3	1	350.664	509.336	860
973	4	20	11	11	957.571	3665.85	1015.2	2	4	2	410.583	1033.42	1444
974	3	13	5	5	957.571	2228.96	989.417	2	3	1	388.606	331.394	720
975	1	17	6	4	957.571	2118.46	968.692	2	3	1	388.606	424.394	813
976	2	14	7	4	908.714	2545.42	949.333	2	3	1	320.432	525.568	846
977	8	18	14	8	908.714	2615.38	941.385	2	3	1	350.664	1329.34	1680
978	3	14	6	3	908.714	2026.92	994.143	1	2	1	285.463	403.537	689
979	3	15	9	6	908.714	3724.7	973.8	2	4	2	410.583	692.417	1103
980	5	13	3	2	908.714	2484.62	951.467	1	3	1	381.27	88.7296	470
981	5	16	11	7	908.714	3459.63	935.8	2	4	1	296.131	952.869	1249
982	4	14	8	7	908.714	2615.38	973.8	2	3	1	350.664	789.336	1140
983	3	12	7	6	908.714	2053.08	973.8	2	3	1	465.192	494.808	960
984	4	15	8	6	908.714	2550	963.812	2	3	1	381.27	496.73	878
985	6	11	5	2	908.714	1581.39	968.5	1	1	1	305.267	193.733	499
986	0	9	6	2	908.714	3338.54	920.583	1	4	1	298.498	365.502	664
987	1	8	7	2	908.714	3452.31	915.917	1	4	1	396.029	447.971	844
988	1	8	7	3	908.714	3295.38	910.385	2	4	1	298.498	796.502	1095
989	2	7	5	0	908.714	3033.85	923.571	2	3	1	320.432	284.568	605
990	0	6	1	5	957	2393.08	764.167	2	3	1	381.27	440.73	822
991	1	8	2	6	957	2157.69	806	2	3	1	336.137	563.863	900
992	1	8	3	7	957	2692.15	821.667	2	3	1	320.432	652.568	973
993	1	8	4	6	957	2545.42	843.286	2	3	1	381.27	571.73	953
994	3	7	1	3	957	3504.62	857	1	4	1	296.131	173.869	470
995	1	10	6	6	957	2785.38	832.75	2	3	1	320.432	527.568	848
996	8	16	13	18	957	2615.38	833.25	2	3	1	350.664	2169.34	2520
997	2	9	4	4	957	2907.52	1069.43	1	3	1	401.969	80.0311	482
998	1	8	5	4	957	2159.78	996	2	3	1	388.606	256.394	645
999	2	8	4	4	721.625	3727.58	957	2	4	2	595.125	292.875	888
1000	2	7	3	3	721.625	2210	950.1	2	3	1	388.606	151.394	540
1001	1	6	2	4	721.625	3478.46	921.9	2	4	1	595.125	113.875	709
1002	2	7	4	5	721.625	2798.33	902.545	2	3	2	377.932	417.068	795
1003	2	6	2	3	721.625	2510.77	877.444	1	3	1	320.432	70.5676	391
1004	1	6	3	4	721.625	3007.69	828.8	1	4	1	368.444	224.556	593
1005	0	8	4	8	721.625	1870	630.375	2	2	2	285.463	652.537	938
1006	0	6	3	8	721.625	4236.92	664.556	2	4	2	542.141	376.859	919
1007	0	6	3	5	692.667	2157.69	721.625	2	3	1	381.27	434.73	816
1008	0	5	3	4	692.667	2301.54	737.286	2	3	1	336.137	329.863	666
1009	0	5	4	5	692.667	2523.85	728.375	2	3	1	381.27	490.73	872
1010	0	4	3	4	692.667	2615.38	742.143	1	3	1	350.664	335.336	686
1011	0	4	1	3	692.667	2641.54	816.167	1	3	1	320.432	109.568	430
1012	2	5	3	5	692.667	1765.38	694	2	3	2	271.833	414.167	686
1013	2	8	4	6	695.444	3452.31	692.667	2	4	1	396.029	623.971	1020
1014	2	3	1	3	695.444	2157.69	677.125	1	3	1	336.137	79.8631	416
1015	1	7	3	5	695.444	3465.38	579.833	2	4	1	296.131	509.869	806
1016	3	6	5	8	695.444	3811.4	612.143	2	4	1	595.125	484.875	1080
1017	2	6	1	4	695.444	2615.38	670.625	1	3	1	350.664	235.336	586
1018	2	6	4	5	695.444	2536.92	661.222	2	3	1	350.664	429.336	780
1019	2	5	2	3	695.444	2802.91	671.667	1	3	1	401.969	66.0311	468
1020	0	6	5	6	695.444	2228.96	651.3	2	3	1	388.606	473.394	862
1021	1	5	2	2	871	2484.62	654.875	2	3	1	381.27	542.73	924
1022	1	5	2	3	871	3556.92	786.571	2	4	2	396.029	618.971	1015
1023	2	4	0	1	871	2944.4	815.125	1	3	1	401.969	230.031	632
1024	1	6	4	4	871	2550	794.778	2	3	1	381.27	559.73	941
1025	1	6	3	3	871	2615.38	809.778	2	3	1	350.664	429.336	780
1026	0	4	3	7	871	3504.62	803.143	2	4	1	296.131	720.869	1017
1027	0	5	3	6	871	3713.85	884.833	2	4	2	443.577	344.423	788
1028	1	6	2	4	779.444	2867.51	862.167	2	3	1	377.932	402.068	780
1029	1	6	1	2	779.444	2692.15	861.2	1	3	1	320.432	206.568	527
1030	0	5	2	4	779.444	2278.78	805.5	2	3	1	336.137	443.863	780
1031	2	7	5	7	779.444	3478.46	801.857	2	4	1	595.125	644.875	1240
1032	1	5	3	5	779.444	2667.69	856.625	2	3	2	230.966	720.034	951
1033	1	6	4	5	779.444	2842.53	869	2	3	1	401.969	378.031	780
1034	1	7	3	4	779.444	2798.33	843	2	3	1	377.932	342.068	720
1035	2	8	4	6	779.444	3060	825.429	2	4	1	298.498	601.502	900
1036	2	4	0	3	779.444	2545.29	834.75	1	3	1	320.432	16.5676	337
1037	1	8	4	5	681	3779.23	779.444	2	4	1	443.577	329.423	773
1038	2	11	6	6	681	2157.69	778.8	2	3	1	381.27	575.73	957
1039	1	8	3	3	681	2419.23	716.875	1	2	1	272.182	238.818	511
1040	0	10	5	4	681	2641.54	661.875	2	3	1	320.432	381.568	702
1041	1	8	5	4	681	2066.15	652.125	2	3	1	388.606	242.394	631
1042	1	6	5	5	681	2105.38	649.778	2	3	1	465.192	314.808	780
1043	1	6	5	7	681	1830.77	649.778	2	3	1	438.014	521.986	960
1044	0	6	5	6	681	3459.63	653.333	2	4	1	296.131	630.869	927
1045	0	5	1	3	657.571	3295.38	635	1	4	1	298.498	67.5021	366
1046	0	6	1	3	657.571	2574.19	641.125	2	3	1	350.664	69.3357	420
1047	0	6	1	4	657.571	2157.69	641.125	2	3	1	336.137	203.863	540
1048	1	9	4	5	657.571	3465.38	608.9	1	4	1	296.131	431.869	728
1049	1	9	3	3	657.571	2157.69	622.667	2	3	1	336.137	143.863	480
1050	3	10	7	7	657.571	2777.15	608.4	3	3	2	401.969	673.031	1075
1051	1	7	4	4	657.571	2536.92	650.818	2	3	1	350.664	249.336	600
1052	2	8	5	5	657.571	2937.6	650.818	2	3	1	401.969	438.031	840
1053	2	7	3	2	657.571	2523.85	622.8	1	3	1	381.27	83.7296	465
1054	0	10	6	4	657.571	2545.42	608.455	2	3	1	320.432	519.568	840
1055	0	8	4	3	657.571	2615.38	635.4	2	3	1	350.664	369.336	720
1056	2	7	5	7	657.571	2393.08	643.091	2	3	1	381.27	570.73	952
1057	2	6	5	6	657.571	2615.38	668.833	2	3	1	350.664	489.336	840
1058	0	6	2	6	813.375	3465.38	706.8	2	4	1	296.131	603.869	900
1059	2	9	3	7	813.375	3583.08	691.333	2	4	1	410.583	632.417	1043
1060	2	9	4	7	813.375	2907.52	745.167	2	3	1	401.969	738.031	1140
1061	3	9	2	4	813.375	3530.77	801.571	1	4	2	396.029	310.971	707
1062	3	6	1	2	813.375	2785.38	789.75	1	3	1	320.432	34.5676	355
1063	0	8	4	5	813.375	3033.85	715.125	2	3	1	320.432	630.568	951
1064	0	10	5	6	813.375	2944.4	741.333	2	3	1	401.969	613.031	1015
1065	1	11	6	8	1056.27	2484.62	813.375	2	3	1	381.27	758.73	1140
1066	1	11	7	9	1056.27	1713.08	906.375	2	2	2	285.463	974.537	1260
1067	2	9	5	5	1056.27	2265.97	945.667	1	3	1	336.137	364.863	701
1068	0	10	4	8	1056.27	2316.45	923.556	1	3	1	381.27	543.73	925
1069	1	11	6	9	1056.27	2981.54	923.7	2	3	2	377.932	762.068	1140
1070	2	11	6	12	1056.27	3060	943.364	2	4	1	298.498	1079.5	1378
1071	2	9	3	5	1056.27	2545.29	979.583	1	3	1	320.432	260.568	581
1072	1	9	3	7	1056.27	2550	1010.11	1	3	1	381.27	453.73	835
1073	2	13	7	10	1056.27	2842.53	997.222	2	3	1	401.969	863.031	1265
1074	2	12	6	9	1056.27	3556.92	1024	1	4	2	396.029	739.971	1136
1075	1	13	7	9	1056.27	3727.58	1036.1	2	4	2	595.125	662.875	1258
1076	3	8	2	5	1077.93	2798.33	1047.9	1	3	1	377.932	210.068	588
1077	0	14	6	5	1077.93	2802.91	1011.78	1	3	1	401.969	534.031	936
1078	1	15	6	8	1077.93	3724.7	1004.2	2	4	2	410.583	729.417	1140
1079	1	13	6	7	1077.93	2667.69	1004.2	2	3	2	230.966	789.034	1020
1080	2	11	4	4	1077.93	3338.54	1025.18	1	4	1	298.498	389.502	688
1081	10	25	16	18	1077.93	2692.15	984.091	2	3	1	320.432	2199.57	2520
1082	1	13	5	6	1077.93	2210	1087.91	2	3	1	388.606	463.394	852
1083	1	12	5	5	1077.93	3295.38	1068.25	1	4	1	298.498	466.502	765
1084	3	16	8	9	1077.93	3665.85	1083.58	2	4	2	410.583	781.417	1192
1085	3	15	7	8	1077.93	3504.62	1091.92	2	4	1	296.131	815.869	1112
1086	3	13	4	6	1077.93	2228.96	1093.36	2	3	1	388.606	391.394	780
1087	1	15	7	9	1077.93	1858.62	1072.47	2	3	2	271.833	988.167	1260
1088	2	17	8	9	1077.93	2615.38	1071.08	2	3	1	350.664	800.336	1151
1089	2	17	7	8	1077.93	2867.51	1077.23	1	3	1	377.932	709.068	1087
1090	2	15	7	9	1201.73	2772.31	1115.62	2	3	2	230.966	923.034	1154
1091	2	14	6	7	1201.73	2545.42	1118.36	1	3	1	320.432	695.568	1016
1092	0	17	9	10	1201.73	2236.15	1111.53	2	3	2	336.137	1076.86	1413
1093	3	17	11	12	1201.73	2170.77	1153.08	4	4	2	480.998	1001	1482
1094	1	14	7	7	1201.73	2545.42	1105.33	1	3	1	381.27	459.73	841
1095	1	15	7	7	1201.73	2301.54	1085	2	3	1	336.137	659.863	996
1096	1	15	8	8	1201.73	2118.46	1078.64	2	3	1	388.606	718.394	1107
1097	0	16	10	10	1201.73	3583.08	1080.53	2	4	1	410.583	919.417	1330
1098	1	17	9	11	1201.73	2468.79	1137.21	2	3	2	350.664	1077.34	1428
1099	1	15	7	9	1201.73	2907.52	1188.75	1	3	1	401.969	730.031	1132
1100	0	17	9	11	1201.73	2157.69	1178.08	2	3	1	336.137	983.863	1320
1101	0	14	7	7	1149.14	3674.62	1201.73	2	4	2	595.125	363.875	959
1102	0	15	8	9	1149.14	2249.23	1181.5	2	3	1	388.606	643.394	1032
1103	0	12	6	7	1149.14	3831.54	1162.7	2	4	1	443.577	516.423	960
1104	1	16	7	9	1149.14	3459.63	1144.27	2	4	1	296.131	844.869	1141
1105	1	15	6	8	1149.14	3590.79	1144	2	4	2	480.998	539.002	1020
1106	2	19	10	11	1149.14	2641.54	1105.5	2	3	1	320.432	1039.57	1360
1107	2	17	8	10	1149.14	2278.78	1125.08	2	3	1	336.137	863.863	1200
1108	2	14	6	7	1149.14	3556.92	1130.43	2	4	2	396.029	563.971	960
1109	1	16	8	12	1149.14	2574.19	1137.45	2	3	1	350.664	1033.34	1384
1110	1	13	5	7	1149.14	2615.38	1133.45	2	3	1	350.664	429.336	780
1111	3	17	10	13	1149.14	3556.92	1101.45	2	4	2	396.029	1080.97	1477
1112	1	14	7	11	1149.14	4014.62	1115.73	2	4	1	443.577	756.423	1200
1113	1	16	8	11	1149.14	2484.62	1122.75	2	3	1	381.27	846.73	1228
1114	1	17	10	12	1149.14	2510.77	1130.85	2	3	1	320.432	1066.57	1387
1115	2	13	6	9	1076.45	2944.4	1149.14	2	3	1	401.969	606.031	1008
1116	2	17	11	13	1076.45	2157.69	1161.92	2	3	1	381.27	1072.73	1454
1117	2	15	9	12	1076.45	2545.42	1182.79	2	3	1	320.432	1022.57	1343
1118	2	12	6	6	1076.45	2942.31	1231.75	1	4	1	368.444	408.556	777
1119	0	12	7	7	1076.45	2937.6	1203.8	1	3	1	401.969	450.031	852
1120	1	16	8	10	1076.45	2066.15	1203.8	2	3	1	388.606	703.394	1092
1121	1	17	8	10	1076.45	2393.08	1165.17	2	3	1	381.27	814.73	1196
1122	1	18	8	10	1076.45	2576.15	1167.54	2	3	2	441.685	798.315	1240
1123	3	8	3	4	1076.45	2981.54	1156.46	1	3	1	377.932	85.0675	463
1124	1	16	7	9	1076.45	2545.29	1047.22	1	3	1	320.432	701.568	1022
1125	2	16	8	12	1076.45	3295.38	1044.7	1	4	1	298.498	1095.5	1394
1126	2	14	5	8	1151.62	2772.31	1083.3	1	3	2	230.966	712.034	943
1127	3	13	3	6	1151.62	2798.46	1070.55	1	1	1	305.267	322.733	628
1128	3	16	10	13	1151.62	2228.96	1033.67	2	3	1	388.606	1175.39	1564
1129	2	16	8	10	1151.62	2692.15	1074.46	1	3	1	320.432	1054.57	1375
1130	2	15	8	11	1151.62	2157.69	1068.38	2	3	1	336.137	1043.86	1380
1131	1	16	10	11	1151.62	2118.46	1071.23	2	3	1	388.606	1012.39	1401
1132	4	14	5	7	1151.62	2615.38	1094.79	1	3	1	350.664	591.336	942
1133	0	16	10	10	1151.62	3465.38	1084.6	2	4	1	296.131	1143.87	1440
1134	0	16	10	11	1151.62	2523.85	1128.8	2	3	1	381.27	1017.73	1399
1135	0	14	9	8	1151.62	2265.97	1170.5	2	3	1	336.137	813.863	1150
1136	0	12	8	6	1151.62	3452.31	1161.62	1	4	1	396.029	548.971	945
1137	0	13	9	7	1151.62	2615.38	1146.14	2	3	1	350.664	673.336	1024
1138	0	9	6	5	1151.62	2536.92	1182.58	2	3	1	350.664	429.336	780
1139	0	8	6	5	826	2545.42	1218.18	2	3	1	381.27	304.73	686
1140	0	9	6	4	826	3504.62	1138.36	2	4	1	296.131	423.869	720
1141	0	9	4	5	826	3060	957.714	2	4	1	298.498	380.502	679
1142	0	6	2	5	826	2802.91	854.857	2	3	1	401.969	318.031	720
1143	3	10	6	11	826	2667.69	838	3	3	2	230.966	1100.03	1331
1144	1	5	2	6	826	3033.85	892.778	2	3	1	320.432	459.568	780
1145	1	5	2	8	826	3665.85	892.778	2	4	1	410.583	549.417	960
1146	1	8	4	7	826	2907.52	862.5	2	3	1	401.969	498.031	900
1147	0	10	4	5	826	3583.08	839.556	1	4	1	410.583	247.417	658
1148	1	10	4	7	1014.8	2615.38	843.5	2	3	1	350.664	380.336	731
1149	1	10	3	5	1014.8	2545.42	844.875	1	3	1	320.432	230.568	551
1150	1	12	5	11	1014.8	3724.7	812.222	2	4	2	410.583	698.417	1109
1151	1	10	3	8	1014.8	3465.38	841.9	1	4	1	296.131	528.869	825
1152	0	12	5	12	1014.8	2510.77	840.364	2	3	1	320.432	857.568	1178
1153	0	15	6	11	1014.8	1830.77	868.5	3	3	1	492.098	656.902	1149
1154	1	14	7	13	1014.8	3674.62	907.667	2	4	2	595.125	734.875	1330
1155	1	14	6	11	1014.8	2842.53	940.154	2	3	1	401.969	738.031	1140
1156	1	15	7	11	1014.8	2053.08	957.1	2	3	1	465.192	674.808	1140
1157	1	13	6	8	1014.8	2785.38	981.1	1	3	1	320.432	622.568	943
1158	0	14	7	9	1014.8	2228.96	977.636	2	3	1	388.606	577.394	966
1159	0	13	7	7	1014.8	2066.15	976.667	2	3	1	388.606	476.394	865
1160	1	14	8	11	1014.8	2615.38	968.077	2	3	1	350.664	909.336	1260
1161	1	15	9	12	1014.8	2523.85	988.929	2	3	1	381.27	852.73	1234
1162	2	13	7	8	1014.8	3338.54	1005.27	1	4	1	298.498	502.502	801
1163	2	14	9	12	1053.09	4251.57	1072.31	3	5	1	922.696	324.304	1247
1164	1	12	6	7	1053.09	1778.46	1104.42	2	3	1	438.014	381.986	820
1165	1	12	7	8	1053.09	2316.45	1074.58	2	3	1	381.27	526.73	908
1166	0	12	6	9	1053.09	4550.77	1029.45	2	4	2	542.141	438.859	981
1167	0	12	6	8	1053.09	2210	1015	2	3	1	388.606	558.394	947
1168	0	13	6	8	1053.09	2236.15	1009.33	2	3	1	336.137	590.863	927
1169	4	17	10	17	1053.09	3988.46	991.583	3	5	2	922.696	853.304	1776
1170	1	12	4	6	1053.09	1896.15	1069.64	2	3	1	444.958	194.042	639
1171	2	11	5	8	1053.09	2118.46	1033.75	2	3	1	388.606	435.394	824
1172	2	11	4	5	1053.09	2278.78	1009.45	2	3	1	336.137	323.863	660
1173	4	15	10	18	1053.09	3727.58	972.9	2	4	1	595.125	1259.87	1855
1174	2	14	6	13	1330.11	3896.92	1053.09	3	5	1	922.696	444.304	1367
1175	2	14	7	13	1330.11	2867.51	1079.25	2	3	1	377.932	961.068	1339
1176	4	11	3	7	1330.11	2183.85	1099.23	2	3	1	465.192	314.808	780
1177	1	13	7	12	1330.11	4184.62	1076.43	3	5	2	922.696	449.304	1372
1178	1	10	7	16	1330.11	2615.38	1122.25	2	3	1	350.664	1269.34	1620
1179	1	10	6	15	1330.11	2937.6	1175.5	1	3	1	401.969	984.031	1386
1180	2	10	10	17	1330.11	2550	1191.69	2	3	1	381.27	1404.73	1786
1181	1	8	6	11	1330.11	3556.92	1283.67	1	4	2	396.029	844.971	1241
1182	1	8	7	9	1330.11	2249.23	1239.08	2	3	1	388.606	691.394	1080
1183	0	3	0	12	1058.5	3530.77	1369	2	4	2	396.029	793.971	1190
1184	0	3	1	8	1058.5	2802.91	1135	3	3	1	401.969	548.031	950
1185	1	4	3	10	1058.5	2641.54	1073.33	2	3	1	320.432	873.568	1194
1186	1	3	2	8	1058.5	2574.19	1111.33	2	3	1	350.664	549.336	900
1187	0	4	1	8	827.2	3465.38	1058.5	2	4	1	296.131	723.869	1020
1188	0	3	1	8	827.2	2301.54	1016	2	3	1	336.137	470.863	807
1189	0	4	2	6	827.2	2842.53	909	1	3	1	401.969	285.031	687
1190	0	4	3	5	827.2	2393.08	838	2	3	1	381.27	353.73	735
1191	0	2	2	6	827.2	2118.46	812.25	2	3	1	388.606	498.394	887
1192	1	4	1	8	1095	3664.81	769.667	2	4	1	480.998	695.002	1176
1193	2	5	3	11	1095	2777.15	871.25	2	3	2	401.969	957.031	1359
1194	1	5	2	9	1095	4195.99	951.167	3	5	1	922.696	110.304	1033
1195	0	5	4	8	1095	2981.54	1063.6	2	3	2	377.932	666.068	1044
1196	0	6	3	8	939.2	4106.15	1095	3	5	1	922.696	151.304	1074
1197	1	4	2	8	939.2	4137.02	1091.5	2	4	2	542.141	537.859	1080
1198	1	4	1	7	939.2	3756.22	1075.5	2	4	1	480.998	335.002	816
1199	4	11	5	1	953.667	4123.42	1403	3	5	1	922.696	539.304	1462
1200	3	9	3	1	953.667	4106.15	1422.67	3	5	1	922.696	269.304	1192
1201	2	12	7	2	953.667	3060	1169.2	2	4	1	298.498	910.502	1209
1202	2	12	7	3	953.667	2210	1175.83	2	3	1	388.606	688.394	1077
1203	3	10	4	2	953.667	4053.85	1161.71	2	4	1	542.141	287.859	830
1204	4	9	2	0	953.667	2545.42	1062	1	3	1	320.432	53.5676	374
1205	0	10	6	2	953.667	1530	976	2	3	1	438.014	336.986	775
1206	1	12	7	2	958.7	3724.7	953.667	2	4	2	410.583	718.417	1129
1207	1	10	6	2	958.7	2131.54	971.2	2	3	1	444.958	354.042	799
1208	0	11	6	1	958.7	2265.97	955.545	2	3	1	336.137	486.863	823
1209	3	12	8	1	958.7	2013.85	897.455	2	3	1	444.958	1109.04	1554
1210	2	8	4	1	958.7	2550	943	2	3	1	381.27	420.73	802
1211	3	7	2	0	958.7	2013.58	930.182	2	3	1	444.958	110.042	555
1212	1	10	6	1	958.7	4550.77	898.917	2	4	1	542.141	741.859	1284
1213	1	8	4	1	958.7	3295.38	905.167	2	4	1	298.498	541.502	840
1214	0	9	4	1	958.7	2053.08	942.1	2	3	1	465.192	475.808	941
1215	1	8	3	0	781.929	2079.23	936.778	2	3	1	444.958	208.042	653
1216	0	9	4	1	781.929	2118.46	917.889	2	3	1	388.606	326.394	715
1217	0	9	4	2	781.929	2079.23	824.667	2	2	1	272.182	387.818	660
1218	0	11	5	2	781.929	2393.08	808.2	2	3	1	381.27	443.73	825
1219	1	14	6	5	781.929	2278.78	836.25	2	3	1	336.137	614.863	951
1220	1	12	3	3	781.929	2510.77	849	1	3	1	320.432	411.568	732
1221	1	11	4	3	781.929	2615.38	799.4	2	3	1	350.664	429.336	780
1222	0	9	4	3	781.929	1935.38	797.636	2	3	1	444.958	295.042	740
1223	2	13	8	3	781.929	4433.08	788.545	1	4	1	542.141	389.859	932
1224	2	10	6	2	781.929	2066.15	800.5	2	2	1	272.182	507.818	780
1225	2	13	9	2	781.929	2228.96	787.083	2	3	1	388.606	574.394	963
1226	3	9	5	2	781.929	3583.08	800.615	1	4	1	410.583	128.417	539
1227	1	13	8	1	811.4	2545.29	781.929	1	3	1	320.432	382.568	703
1228	2	12	6	0	811.4	2301.54	786.538	2	3	1	532.915	317.085	850
1229	2	14	7	0	811.4	2937.6	775.786	2	3	1	401.969	503.031	905
1230	2	7	2	0	811.4	1539.55	790.846	1	1	1	305.267	73.7326	379
1231	1	8	3	0	811.4	2471.54	746.846	1	2	1	272.182	116.818	389
1232	4	17	9	4	811.4	3268.97	721.286	2	4	2	368.444	843.556	1212
1233	1	12	5	1	811.4	3452.31	754	1	4	1	396.029	261.971	658
1234	2	12	5	2	811.4	2615.38	737.929	2	3	1	350.664	429.336	780
1235	2	15	6	3	811.4	2316.45	740.733	2	3	1	381.27	466.73	848
1236	1	13	6	4	811.4	3465.38	745.643	2	4	1	296.131	663.869	960
1237	1	14	8	4	811.4	2432.31	738.75	2	3	2	441.685	624.315	1066
1238	2	17	9	3	811.4	2777.15	747.125	2	3	2	401.969	855.031	1257
1239	3	17	10	2	811.4	4276.15	780.643	2	4	1	542.141	699.859	1242
1240	3	11	5	2	958.143	2340.77	819.143	1	2	1	272.182	304.818	577
1241	2	11	5	1	958.143	2484.62	803	1	3	1	381.27	237.73	619
1242	1	15	7	1	958.143	2066.15	791.5	1	3	1	388.606	457.394	846
1243	0	16	9	1	958.143	2615.38	794.706	2	3	1	350.664	729.336	1080
1244	1	14	7	2	958.143	4276.15	822.267	1	4	1	542.141	392.859	935
1245	1	12	5	1	958.143	2785.38	859.333	1	3	1	320.432	350.568	671
1246	2	14	8	5	958.143	2468.79	847.562	2	3	2	350.664	861.336	1212
1247	1	13	6	2	958.143	2236.15	869	2	3	1	444.958	320.042	765
1248	1	14	7	5	958.143	3713.85	863.222	1	4	1	443.577	650.423	1094
1249	1	14	9	7	958.143	3665.85	884.176	2	4	2	410.583	914.417	1325
1250	1	11	6	6	958.143	3556.92	932.375	1	4	2	396.029	591.971	988
1251	0	12	7	7	958.143	2667.69	939.867	2	3	2	230.966	849.034	1080
1252	0	15	7	6	958.143	2419.23	956.462	1	2	1	272.182	854.818	1127
1253	0	15	7	7	958.143	2301.54	968.643	1	4	1	595.125	499.875	1095
1254	0	15	7	6	1157.21	1870	987.462	2	2	1	285.463	734.537	1020
1255	1	16	6	5	1157.21	1778.46	1028.36	2	2	1	285.463	554.537	840
1256	9	22	14	9	1157.21	2615.38	1012.67	2	3	1	350.664	1749.34	2100
1257	4	15	7	7	1157.21	1804.62	1109.75	1	2	1	285.463	959.537	1245
1258	3	11	3	4	1157.21	2842.53	1120.15	1	3	1	401.969	24.0311	426
1259	7	21	13	9	1157.21	2576.15	1070.57	2	4	1	342.592	1637.41	1980
1260	3	15	5	5	1157.21	3530.77	1164.07	1	4	2	396.029	202.971	599
1261	3	15	7	6	1157.21	2170.77	1147.62	2	4	2	480.998	635.002	1116
1262	3	14	7	6	1157.21	2772.31	1134.67	2	3	2	230.966	909.034	1140
1263	5	16	9	5	1157.21	3910	1135.08	2	4	1	443.577	996.423	1440
1264	4	12	6	4	1157.21	1935.38	1156.86	2	2	1	285.463	794.537	1080
1265	2	18	10	6	1157.21	2210	1156.86	2	2	1	272.182	1287.82	1560
1266	8	11	2	3	1157.21	2157.69	1177.25	1	3	1	381.27	193.73	575
1267	4	13	6	4	1157.21	3190.77	1151.44	2	4	1	368.444	711.556	1080
1268	1	17	9	4	1058.36	3583.08	1167.77	1	4	1	480.998	567.002	1048
1269	1	15	6	2	1058.36	2641.54	1183.77	1	3	1	320.432	382.568	703
1270	1	16	8	3	1058.36	2236.15	1149.43	2	2	1	272.182	747.818	1020
1271	1	15	6	2	1058.36	2798.46	1072.29	1	1	1	305.267	429.733	735
1272	6	20	13	6	1058.36	2105.38	1008	2	3	1	465.192	914.808	1380
1273	3	15	9	5	1058.36	2159.78	1073.08	1	3	1	388.606	632.394	1021
1274	1	14	7	2	1058.36	3504.62	1073.08	1	4	1	296.131	364.869	661
1275	3	14	7	2	1058.36	1974.62	1039.93	3	2	1	285.463	603.537	889
1276	3	18	11	6	1058.36	2576.15	1014.77	2	3	2	441.685	818.315	1260
1277	4	12	5	2	1058.36	3504.62	1000.92	1	4	1	480.998	41.0024	522
1278	2	12	6	3	1058.36	2746.15	938.091	1	1	1	305.267	414.733	720
1279	2	14	7	4	1058.36	2545.42	905.364	1	3	1	320.432	457.568	778
1280	0	17	8	6	1058.36	2157.69	894.75	2	3	1	336.137	623.863	960
1281	16	33	23	18	1058.36	3504.62	899.769	2	4	2	480.998	2639	3120
1282	2	16	6	3	1129.05	2536.92	1058.36	2	3	1	350.664	409.336	760
1283	2	17	6	3	1129.05	3753.08	1038.47	2	4	1	443.577	396.423	840
1284	3	14	4	2	1129.05	1686.92	1024.6	1	2	1	285.463	291.537	577
1285	6	22	11	8	1129.05	3811.4	996.625	2	4	1	595.125	904.875	1500
1286	2	16	5	2	1129.05	3338.54	1026.24	1	4	1	298.498	473.502	772
1287	2	15	5	3	1129.05	2301.54	1030.94	2	3	1	336.137	417.863	754
1288	3	17	7	4	1129.05	2981.54	1014.65	2	3	2	377.932	573.068	951
1289	3	20	8	5	1129.05	4137.02	1011.11	2	4	1	542.141	592.859	1135
1290	4	20	11	8	1129.05	3073.08	1012.94	2	4	1	368.444	989.556	1358
1291	4	20	10	7	1129.05	1765.38	1032.11	2	3	2	271.833	942.167	1214
1292	6	13	4	2	1129.05	3661.54	1041.68	1	4	1	443.577	49.4228	493
1293	3	17	7	7	1129.05	3556.92	1042	1	4	2	396.029	580.971	977
1294	1	18	10	9	1129.05	3138.46	1038.39	2	4	1	368.444	1012.56	1381
1295	1	18	10	9	1129.05	2802.91	1045.11	1	3	1	401.969	982.031	1384
1296	1	19	10	9	1129.05	3452.31	1136	2	4	1	396.029	1223.97	1620
1297	2	17	9	8	1129.05	2278.78	1136	2	3	1	336.137	1043.86	1380
1298	1	21	11	9	1129.05	2545.29	1189.18	1	3	1	320.432	1319.57	1640
1299	4	15	7	6	1129.05	1896.15	1102.12	1	3	1	444.958	531.042	976
1300	1	22	13	9	1129.05	2867.51	1095.11	2	3	1	377.932	1362.07	1740
1301	1	18	9	7	1387.83	2183.85	1149.56	1	2	1	272.182	1048.82	1321
1302	4	22	12	8	1387.83	2157.69	1278.38	2	3	1	336.137	1463.86	1800
1303	2	17	8	3	1387.83	3033.85	1337.45	1	3	1	320.432	705.568	1026
1304	2	15	6	2	1387.83	1686.92	1431.89	1	2	1	285.463	392.537	678
1305	2	18	9	6	1387.83	3191.29	1356.5	2	4	1	368.444	904.556	1273
1306	2	14	7	4	1387.83	4341.54	1348.91	2	4	1	542.141	597.859	1140
1307	0	21	9	6	1387.83	2265.97	1348.91	2	3	1	336.137	1163.86	1500
1308	3	24	12	9	1387.83	2563.08	1341.17	2	4	1	342.592	1517.41	1860
1309	1	21	9	5	1387.83	1909.23	1381.08	2	2	1	285.463	894.537	1180
1310	2	20	9	7	1387.83	2798.33	1344.5	2	3	2	377.932	1002.07	1380
1311	2	18	7	6	1387.83	3831.54	1322.83	1	4	1	443.577	600.423	1044
1312	9	25	18	15	1387.83	4014.62	1291.09	4	4	2	443.577	2008.42	2452
1313	4	20	10	6	1281.46	2944.4	1393.91	2	3	1	401.969	1038.03	1440
1314	2	18	7	6	1281.46	3060	1397.75	2	4	1	298.498	789.502	1088
1315	2	18	7	6	1281.46	3465.38	1373.92	2	4	1	480.998	539.002	1020
1316	6	22	14	10	1281.46	1909.23	1348.64	2	3	2	271.833	1443.17	1715
1317	3	18	7	5	1281.46	3282.31	1342.57	1	4	1	368.444	661.556	1030
1318	4	19	11	7	1281.46	2228.96	1321.73	2	3	1	388.606	991.394	1380
1319	4	19	12	8	1281.46	2523.85	1325.38	2	3	1	381.27	1077.73	1459
1320	4	18	8	6	1281.46	2777.15	1333.24	2	3	1	401.969	798.031	1200
1321	4	16	7	5	1281.46	1581.39	1343.47	1	1	1	305.267	752.733	1058
1322	1	18	12	8	1281.46	2937.6	1379	2	3	1	401.969	1055.03	1457
1323	1	19	13	8	1281.46	2550	1384.2	2	3	1	381.27	1030.73	1412
1324	2	21	13	10	1281.46	3459.63	1365.77	2	4	1	296.131	1179.87	1476
1325	3	15	8	6	1281.46	3439.23	1373.64	1	4	1	480.998	443.002	924
1326	1	17	9	8	940.636	2545.42	1281.46	2	3	1	381.27	697.73	1079
1327	1	13	8	7	940.636	2236.15	1267.5	2	3	2	336.137	743.863	1080
1328	2	15	9	7	940.636	2574.19	1267.5	2	3	1	350.664	969.336	1320
1329	2	13	9	5	940.636	3530.77	1246.5	2	4	1	396.029	743.971	1140
1330	2	11	7	4	940.636	3007.69	1216.22	2	4	1	368.444	605.556	974
1331	4	9	2	2	940.636	2419.23	1206.89	1	2	1	272.182	115.818	388
1332	1	13	8	5	940.636	2066.15	1125	2	3	1	388.606	714.394	1103
1333	1	14	9	5	940.636	3504.62	1123	2	4	1	296.131	901.869	1198
1334	5	8	3	1	940.636	2615.38	1099.45	1	3	1	350.664	121.336	472
1335	1	12	6	5	940.636	2692.15	972.667	1	3	1	320.432	546.568	867
1336	1	11	5	5	940.636	2118.46	962.1	2	3	1	388.606	337.394	726
1337	1	9	5	5	797.5	3465.38	926.8	2	4	1	296.131	543.869	840
1338	1	9	4	5	797.5	2316.45	918.909	1	3	1	381.27	301.73	683
1339	0	8	4	4	797.5	1530	899.25	2	3	1	438.014	221.986	660
1340	1	9	6	4	797.5	3465.38	822.818	1	4	1	296.131	426.869	723
1341	2	12	8	5	797.5	2615.38	814.5	2	3	1	350.664	750.336	1101
1342	2	7	4	2	797.5	2802.91	836.538	1	3	1	401.969	93.0311	495
1343	1	6	4	3	797.5	2157.69	771.333	2	3	1	336.137	263.863	600
1344	1	11	4	5	797.5	2393.08	743.889	2	3	1	381.27	531.73	913
1345	2	11	4	7	797.5	3674.62	760.8	2	4	2	595.125	512.875	1108
1346	2	6	1	3	797.5	2785.38	792.364	1	3	1	320.432	176.568	497
1347	1	14	5	7	797.5	2510.77	767.75	2	3	2	441.685	741.315	1183
1348	2	10	2	4	797.5	2157.69	800.273	2	3	1	381.27	385.73	767
1349	1	14	6	7	971.917	2641.54	793.636	2	3	1	320.432	748.568	1069
1350	1	13	4	4	971.917	3295.38	845.6	2	4	1	298.498	541.502	840
1351	0	13	6	7	971.917	2798.33	845.091	2	3	1	377.932	699.068	1077
1352	1	13	8	8	971.917	2536.92	864.417	2	3	1	350.664	836.336	1187
1353	4	15	11	11	971.917	3583.08	889.231	1	4	1	410.583	1176.42	1587
1354	2	12	6	6	971.917	3033.85	955.692	2	3	1	320.432	519.568	840
1355	2	12	7	6	971.917	2157.69	972.333	2	3	1	336.137	577.863	914
1356	2	10	6	6	971.917	2301.54	998.5	1	3	1	336.137	375.863	712
1357	1	12	8	6	971.917	2981.54	976.462	3	3	2	377.932	465.068	843
1358	0	11	9	8	971.917	4066.92	966.929	2	4	1	443.577	696.423	1140
1359	1	12	5	5	971.917	3556.92	997.818	2	4	2	396.029	600.971	997
1360	0	4	3	3	971.917	3020.77	997.818	1	4	1	368.444	88.5559	457
1361	1	10	3	4	735.769	1739.23	971.917	2	3	1	438.014	204.986	643
1362	7	12	9	6	735.769	2615.38	903.667	2	3	1	350.664	909.336	1260
1363	1	9	2	1	735.769	2545.42	939.3	1	3	1	320.432	274.568	595
1364	4	10	6	4	735.769	2523.85	908	2	3	1	381.27	549.73	931
1365	2	9	3	3	735.769	2468.79	909.917	2	3	1	350.664	278.336	629
1366	4	10	8	5	735.769	3338.54	888.308	2	4	1	298.498	721.502	1020
1367	3	9	4	3	735.769	2785.38	844.692	1	1	1	305.267	376.733	682
1368	3	9	4	2	735.769	1556.15	832.538	1	1	1	305.267	95.7326	401
1369	2	8	5	4	735.769	2942.31	799.833	2	4	1	368.444	111.556	480
1370	0	9	5	6	735.769	2210	735.909	2	3	1	388.606	337.394	726
1371	0	6	2	4	735.769	2545.29	735.083	1	3	1	320.432	215.568	536
1372	1	10	4	6	735.769	3583.08	719.769	2	4	1	480.998	529.002	1010
1373	1	8	2	3	735.769	3665.85	742.75	1	4	2	410.583	241.417	652
1374	0	11	4	3	867.875	2550	735.769	2	3	1	381.27	337.73	719
1375	0	12	4	3	867.875	1900.99	741.615	2	2	1	285.463	423.537	709
1376	1	13	5	5	867.875	3452.31	699.231	2	4	1	396.029	503.971	900
1377	2	14	7	6	867.875	2159.78	713.571	2	3	1	388.606	706.394	1095
1378	2	11	4	3	867.875	2772.31	722.8	1	3	2	230.966	294.034	525
1379	2	16	8	6	867.875	2432.31	704.818	2	3	2	441.685	633.315	1075
1380	4	15	10	6	867.875	3530.77	735.667	2	4	2	396.029	856.971	1253
1381	3	11	4	3	867.875	2288.46	775.462	1	2	1	272.182	216.818	489
1382	2	14	7	5	867.875	2545.42	782.231	2	3	1	381.27	600.73	982
1383	2	14	8	6	867.875	2777.15	796.5	2	3	2	401.969	619.031	1021
1384	1	12	8	5	867.875	3811.4	835.143	2	4	1	595.125	459.875	1055
1385	5	11	3	2	867.875	2615.38	849.8	1	3	1	350.664	55.3357	406
1386	3	12	10	7	867.875	2667.69	828.467	2	3	2	230.966	864.034	1095
1387	3	10	8	6	867.875	2316.45	845.125	2	3	1	381.27	578.73	960
1388	3	9	7	6	867.875	3459.63	851.882	2	4	1	296.131	573.869	870
1389	3	8	5	5	867.875	2798.46	862.875	1	1	1	305.267	426.733	732
1390	0	4	2	4	589.167	2013.58	903.455	1	3	1	444.958	82.0416	527
1391	0	5	2	5	589.167	2278.78	853.636	2	3	1	336.137	409.863	746
1392	1	5	3	7	589.167	2393.08	807.545	2	3	1	381.27	503.73	885
1393	2	5	4	7	589.167	1830.77	830.714	2	3	1	438.014	353.986	792
1394	1	3	2	3	589.167	2265.97	684.571	1	3	1	336.137	8.86313	345
1395	0	7	1	7	939.571	3556.92	589.167	2	4	2	396.029	479.971	876
1396	1	9	2	10	939.571	2937.6	630.143	2	3	1	401.969	638.031	1040
1397	0	9	2	10	939.571	2301.54	681.375	2	3	1	336.137	803.863	1140
1398	0	7	2	10	939.571	2484.62	681.375	2	3	1	381.27	638.73	1020
1399	1	6	1	7	939.571	2353.85	681.375	2	2	2	272.182	507.818	780
1400	2	13	7	11	939.571	3556.92	790.889	2	4	2	396.029	809.971	1206
1401	1	12	5	10	939.571	3674.62	832.4	2	4	2	595.125	367.875	963
1402	2	14	8	8	939.571	2692.15	840.2	2	3	1	320.432	708.568	1029
1403	2	12	5	5	939.571	2118.46	857.364	1	3	1	388.606	250.394	639
1404	1	11	6	5	939.571	2842.53	843.455	1	3	1	401.969	332.031	734
1405	0	12	6	5	939.571	2545.42	942.7	2	3	1	320.432	459.568	780
1406	1	13	7	6	939.571	2798.33	942.7	2	3	2	377.932	642.068	1020
1407	1	16	8	6	939.571	3452.31	935.583	2	4	1	396.029	750.971	1147
1408	2	11	5	5	939.571	2066.15	951.846	2	3	1	388.606	391.394	780
1409	3	12	8	4	853.375	2157.69	944.462	2	3	1	381.27	658.73	1040
1410	1	12	5	3	853.375	2510.77	951.286	1	3	1	320.432	473.568	794
1411	2	11	6	4	853.375	2802.91	940.8	2	3	1	401.969	498.031	900
1412	1	11	8	6	853.375	2468.79	938.25	2	3	2	350.664	751.336	1102
1413	3	9	3	2	853.375	3033.85	933.385	1	3	1	320.432	215.568	536
1414	2	9	8	7	853.375	2157.69	875.083	2	3	1	336.137	720.863	1057
1415	1	8	6	5	853.375	2615.38	889.077	1	3	1	532.915	145.085	678
1416	1	8	7	4	853.375	2615.38	874	2	3	1	350.664	369.336	720
1417	0	3	1	3	668.429	2249.23	853.375	1	3	1	388.606	28.3941	417
1418	0	5	2	4	668.429	3338.54	615.667	1	4	1	298.498	238.502	537
1419	1	7	2	2	668.429	2523.85	615.833	2	3	1	381.27	337.73	719
1420	1	8	3	2	668.429	2316.45	630.571	2	3	1	381.27	328.73	710
1421	0	9	3	2	668.429	2615.38	502.667	2	3	1	350.664	244.336	595
1422	0	9	3	2	668.429	2159.78	515.857	2	3	1	388.606	219.394	608
1423	1	10	5	3	668.429	2545.42	527.375	2	3	1	381.27	458.73	840
1424	2	10	7	3	668.429	2981.54	562.111	2	3	2	377.932	670.068	1048
1425	2	9	3	2	668.429	2944.4	610.7	1	3	1	401.969	68.0311	470
1426	1	8	4	2	668.429	2545.29	597.909	2	3	1	320.432	354.568	675
1427	2	11	8	4	668.429	3530.77	604.333	2	4	2	396.029	869.971	1266
1428	1	8	5	2	668.429	2183.85	655.231	2	3	1	465.192	374.808	840
1429	1	8	5	2	783.333	2641.54	668.429	2	3	1	320.432	519.568	840
1430	3	10	6	5	783.333	3556.92	749	2	4	2	396.029	903.971	1300
1431	1	5	2	4	783.333	3465.38	848.2	1	4	1	296.131	410.869	707
1432	1	6	2	4	783.333	2574.19	835.364	2	3	1	350.664	429.336	780
1433	1	7	2	3	783.333	2236.15	852.182	2	3	2	336.137	383.863	720
1434	1	8	4	1	783.333	2615.38	891	1	3	1	350.664	219.336	570
1435	1	7	3	1	783.333	2550	855.333	1	3	1	381.27	123.73	505
1436	0	8	4	1	783.333	2210	774.571	2	3	1	388.606	262.394	651
1437	1	10	6	4	783.333	3665.85	759.125	2	4	2	410.583	566.417	977
1438	1	8	5	5	810.7	2066.15	776.25	2	3	1	388.606	511.394	900
1439	1	9	5	6	810.7	2907.52	790	2	3	1	401.969	550.031	952
1440	3	5	1	3	810.7	3459.63	806.2	1	4	1	296.131	193.869	490
1441	0	10	4	6	810.7	2265.97	727.222	1	3	1	336.137	399.863	736
1442	0	9	4	6	810.7	1765.38	722.333	2	3	2	271.833	527.167	799
1443	1	8	4	8	810.7	2131.54	731.111	2	3	1	444.958	374.042	819
1444	1	9	5	7	810.7	2393.08	739.9	2	3	1	381.27	518.73	900
1445	3	11	7	10	810.7	3504.62	754.455	2	4	1	296.131	989.869	1286
1446	3	6	2	3	810.7	2667.69	798.75	1	3	2	230.966	162.034	393
1447	1	9	5	6	810.7	2772.31	767.538	2	3	2	230.966	601.034	832
1448	1	8	3	4	761.875	2777.15	810.7	2	3	1	401.969	258.031	660
1449	0	7	4	5	761.875	2228.96	786.7	2	3	1	388.606	324.394	713
1450	0	6	4	5	761.875	3831.54	762.8	1	4	1	443.577	358.423	802
1451	0	6	4	5	761.875	2785.38	794	2	3	1	320.432	397.568	718
1452	0	6	5	5	761.875	2118.46	787.091	2	3	1	388.606	272.394	661
1453	0	5	2	7	761.875	2157.69	758.125	2	3	1	336.137	443.863	780
1454	0	5	1	9	761.875	2301.54	722.333	2	3	1	336.137	528.863	865
1455	0	6	2	9	761.875	2432.31	742.714	2	3	2	441.685	454.315	896
1456	0	9	3	8	979.923	2798.33	761.875	2	3	2	377.932	582.068	960
1457	0	9	3	9	979.923	2842.53	811.714	2	3	1	401.969	519.031	921
1458	0	9	4	8	979.923	3583.08	828.714	2	4	1	410.583	429.417	840
1459	2	13	6	12	979.923	3033.85	846.143	2	3	1	320.432	999.568	1320
1460	2	12	6	11	979.923	2545.29	905.375	2	3	1	320.432	1059.57	1380
1461	2	12	7	11	979.923	3465.38	995.25	2	4	1	296.131	1071.87	1368
1462	3	9	3	4	979.923	2802.91	1036.67	1	3	1	401.969	61.0311	463
1463	0	10	5	8	979.923	3060	941	2	4	1	298.498	661.502	960
1464	0	10	6	8	979.923	2615.38	942.727	1	3	1	532.915	432.085	965
1465	0	9	6	7	979.923	2278.78	944.583	2	3	1	336.137	733.863	1070
1466	1	8	7	8	979.923	2576.15	954.231	2	3	2	441.685	693.315	1135
1467	1	8	6	7	979.923	3295.38	975	2	4	1	298.498	661.502	960
1468	0	5	5	3	829.5	3338.54	1001.8	1	4	1	298.498	522.502	821
1469	4	13	4	8	829.5	3727.58	985.167	2	4	2	595.125	723.875	1319
1470	3	9	2	5	829.5	2157.69	1032.86	2	3	1	381.27	557.73	939
1471	3	16	6	9	829.5	3556.92	873.2	2	4	2	396.029	816.971	1213
1472	3	6	1	2	829.5	2510.77	923.8	1	3	1	320.432	37.5676	358
1473	2	15	6	7	1057.53	3504.62	829.5	1	4	1	296.131	697.869	994
1474	4	18	9	11	1057.53	3779.23	853	2	4	2	443.577	876.423	1320
1475	2	16	6	8	1057.53	2615.38	851.333	2	3	1	350.664	677.336	1028
1476	4	14	3	5	1057.53	2545.42	869	2	3	1	320.432	339.568	660
1477	1	17	8	8	1057.53	2249.23	852.9	2	3	1	388.606	713.394	1102
1478	2	15	6	7	1057.53	2641.54	875.545	2	3	1	320.432	531.568	852
1479	3	20	12	11	1057.53	3583.08	873.583	2	4	1	410.583	1078.42	1489
1480	2	17	9	9	1057.53	2536.92	920.923	2	3	1	350.664	849.336	1200
1481	2	18	9	8	1057.53	2615.38	940.857	2	3	1	350.664	758.336	1109
1482	3	16	7	7	1057.53	2157.69	952.067	2	3	1	336.137	567.863	904
1483	0	18	11	9	1057.53	2692.15	949.062	2	3	1	320.432	879.568	1200
1484	0	16	9	8	1057.53	2867.51	963.824	2	3	1	377.932	604.068	982
1485	1	17	11	9	1057.53	3811.4	944	2	4	1	595.125	651.875	1247
1486	1	15	8	7	1057.53	2523.85	962.118	2	3	1	381.27	578.73	960
1487	1	16	10	8	1057.53	2118.46	962	2	3	1	388.606	787.394	1176
1488	3	15	12	10	1057.53	3665.85	997.176	2	4	2	410.583	973.417	1384
1489	2	13	8	8	905.2	2159.78	1057.53	2	3	1	388.606	631.394	1020
1490	3	12	6	5	905.2	3452.31	1055.44	1	4	1	396.029	293.971	690
1491	1	10	6	5	905.2	2574.19	1093.93	2	3	1	350.664	429.336	780
1492	1	12	8	7	905.2	3674.62	1073	2	4	2	595.125	460.875	1056
1493	1	8	5	5	905.2	1830.77	1042.33	1	3	1	438.014	172.986	611
1494	1	11	7	8	905.2	2981.54	1009.64	3	3	2	377.932	701.068	1079
1495	1	10	4	6	905.2	2316.45	972.889	2	3	1	381.27	431.73	813
1496	2	5	1	3	905.2	2777.15	956.556	1	3	2	401.969	11.0311	413
1497	5	15	9	11	905.2	2066.15	902.2	2	3	1	388.606	1134.39	1523
1498	4	12	6	7	905.2	3465.38	887.222	2	4	1	296.131	770.869	1067
1499	3	8	3	5	797.188	2393.08	905.2	2	3	1	381.27	256.73	638
1500	3	12	5	7	797.188	2615.38	886.667	2	3	1	350.664	589.336	940
1501	4	10	3	5	797.188	2265.97	892	2	3	1	336.137	267.863	604
1502	5	7	1	2	797.188	2890	865.818	1	1	1	305.267	100.733	406
1503	1	13	7	7	797.188	3465.38	831.818	2	4	1	296.131	843.869	1140
1504	1	12	6	7	797.188	3530.77	839.455	2	4	2	396.029	563.971	960
1505	2	9	4	5	797.188	2550	849.5	1	3	1	381.27	331.73	713
1506	0	13	7	6	797.188	2484.62	839	2	3	1	381.27	638.73	1020
1507	0	13	6	7	797.188	2937.6	853.083	2	3	1	401.969	498.031	900
1508	0	13	7	6	797.188	2545.29	856.692	2	3	1	320.432	619.568	940
1509	2	12	7	8	797.188	2944.4	848	2	3	1	401.969	503.031	905
1510	2	11	6	6	797.188	3556.92	852.75	1	4	2	396.029	309.971	706
1511	2	9	4	3	797.188	3295.38	841.462	1	4	1	298.498	141.502	440
1512	0	10	6	7	797.188	2641.54	812.786	2	3	1	320.432	394.568	715
1513	1	11	7	9	797.188	1713.08	787.643	2	2	2	285.463	657.537	943
1514	1	10	6	7	797.188	2785.38	798	2	3	1	320.432	464.568	785
1515	0	8	5	7	773	2228.96	847.25	1	3	1	388.606	275.394	664
1516	0	7	5	4	773	2157.69	807.583	2	3	1	336.137	263.863	600
1517	0	8	4	7	773	3459.63	791.615	2	4	1	296.131	571.869	868
1518	1	9	5	5	773	2301.54	769.636	1	3	1	336.137	471.863	808
1519	4	10	6	8	773	3713.85	743.4	2	4	2	443.577	876.423	1320
1520	2	13	6	5	773	2667.69	711.091	2	3	2	230.966	940.034	1171
1521	2	6	2	3	773	2536.92	777.545	2	3	1	350.664	189.336	540
1522	1	12	5	4	773	4137.02	761.636	2	4	1	542.141	537.859	1080
1523	5	13	9	8	826.545	3727.58	744.9	2	4	2	595.125	809.875	1405
1524	5	14	10	8	826.545	2170.77	804.909	4	4	2	480.998	971.002	1452
1525	2	8	2	2	826.545	1935.38	883.8	2	3	1	444.958	155.042	600
1526	3	8	4	4	826.545	2772.31	858	2	3	2	230.966	549.034	780
1527	3	8	3	3	826.545	2278.78	851.5	1	3	1	336.137	209.863	546
1528	2	8	5	5	826.545	2157.69	828	2	3	1	336.137	437.863	774
1529	2	9	5	5	826.545	2523.85	825.385	2	3	1	381.27	338.73	720
1530	1	11	4	7	826.545	2468.79	860	2	3	2	350.664	606.336	957
1531	0	12	4	7	826.545	2615.38	813.2	2	3	1	350.664	609.336	960
1532	5	14	9	11	835.75	3674.62	826.545	2	4	2	595.125	850.875	1446
1533	3	13	5	6	835.75	2157.69	923.182	2	3	1	381.27	562.73	944
1534	3	12	4	6	835.75	2798.33	924.917	2	3	2	377.932	419.068	797
1535	2	12	5	7	835.75	3338.54	821.727	2	4	1	298.498	541.502	840
1536	4	10	2	3	835.75	2066.15	823.25	1	3	1	388.606	84.3941	473
1537	1	12	6	5	835.75	2159.78	796.308	2	3	1	388.606	448.394	837
1538	2	12	9	6	835.75	2545.42	848.9	2	3	1	320.432	626.568	947
1539	2	11	8	5	835.75	2249.23	857.818	2	3	1	388.606	351.394	740
1540	1	11	9	7	835.75	2615.38	859.636	2	3	1	350.664	688.336	1039
1541	1	10	8	6	835.75	3504.62	874.583	2	4	1	296.131	680.869	977
1542	4	8	4	3	835.75	2944.4	882.462	1	3	1	401.969	25.0311	427
1543	0	4	3	2	835.75	3452.31	868.917	1	4	1	396.029	165.971	562
1544	1	7	4	5	753.286	3556.92	780.273	2	4	2	396.029	634.971	1031
1545	1	4	0	2	753.286	3060	781.444	1	4	1	298.498	137.502	436
1546	2	5	4	8	753.286	2842.53	777.333	2	3	1	401.969	642.031	1044
1547	2	5	3	6	753.286	2118.46	800.333	2	3	1	388.606	391.394	780
1548	2	5	2	5	753.286	2228.96	798.3	2	3	1	388.606	207.394	596
1549	0	5	3	5	753.286	3465.38	741.5	1	4	1	296.131	429.869	726
1550	0	3	1	4	753.286	2867.51	739.286	2	3	1	377.932	282.068	660
1551	0	5	2	4	929.545	2777.15	753.286	1	3	1	401.969	246.031	648
1552	0	5	2	2	929.545	2510.77	698.571	1	3	1	320.432	156.568	477
1553	1	6	3	4	929.545	2981.54	704.429	1	3	1	377.932	399.068	777
1554	9	16	11	16	929.545	2432.31	704.429	2	3	2	441.685	2135.31	2577
1555	1	6	2	4	929.545	3465.38	899.714	1	4	1	296.131	190.869	487
1556	3	10	4	10	929.545	3530.77	848.125	1	4	1	396.029	958.971	1355
1557	2	9	2	6	929.545	2907.52	904.444	1	3	1	401.969	341.031	743
1558	3	11	5	9	929.545	3556.92	906.333	2	4	2	396.029	917.971	1314
1559	3	9	1	4	929.545	2692.15	979	1	3	1	320.432	328.568	649
1560	2	8	2	5	929.545	2157.69	946	2	3	1	336.137	428.863	765
1561	2	12	6	7	934.455	2615.38	957.7	2	3	1	350.664	789.336	1140
1562	2	11	5	6	934.455	2393.08	974.273	2	3	1	381.27	621.73	1003
1563	1	13	8	6	934.455	2802.91	1022.09	2	3	1	401.969	738.031	1140
1564	1	11	7	5	934.455	3665.85	1031.92	1	4	2	410.583	539.417	950
1565	0	11	6	6	934.455	2944.4	954.6	2	3	1	401.969	582.031	984
1566	0	11	6	6	934.455	2550	1004.3	2	3	1	381.27	502.73	884
1567	1	12	7	8	934.455	3724.7	957.2	2	4	2	410.583	609.417	1020
1568	1	10	5	7	934.455	2667.69	948.333	2	3	2	230.966	595.034	826
1569	2	7	3	3	934.455	2536.92	936.1	1	3	1	350.664	23.3357	374
1570	0	10	5	8	934.455	3811.4	885	2	4	1	595.125	402.875	998
1571	0	10	5	8	934.455	3459.63	894.417	2	4	1	296.131	663.869	960
1572	1	9	5	8	832.273	2615.38	904	2	3	1	350.664	549.336	900
1573	1	9	6	7	832.273	3295.38	903.6	2	4	1	298.498	595.502	894
1574	2	8	3	5	832.273	2105.38	879	1	3	1	465.192	120.808	586
1575	0	10	5	7	832.273	2066.15	842.6	2	3	1	388.606	342.394	731
1576	1	11	6	7	832.273	3504.62	817.3	2	4	1	296.131	543.869	840
1577	1	9	4	4	832.273	2484.62	812.9	1	3	1	381.27	126.73	508
1578	2	9	5	7	832.273	2545.42	761.7	2	3	1	381.27	548.73	930
1579	1	8	3	5	832.273	2574.19	777	2	3	1	350.664	316.336	667
1580	2	9	7	11	832.273	2937.6	767.833	2	3	1	401.969	1038.03	1440
1581	2	7	3	5	832.273	3452.31	819.538	1	4	1	396.029	300.971	697
1582	1	7	4	8	832.273	2236.15	832.091	2	3	2	336.137	625.863	962
1583	0	6	5	7	886.75	2545.42	832.273	2	3	1	320.432	699.568	1020
1584	0	7	4	9	886.75	2510.77	838.1	2	3	1	320.432	654.568	975
1585	1	7	2	6	886.75	2157.69	955.857	2	3	1	336.137	563.863	900
1586	2	8	4	8	886.75	3727.58	948.875	1	4	2	595.125	477.875	1073
1587	2	7	1	3	886.75	2545.29	937.833	1	3	1	320.432	203.568	524
1588	1	11	4	8	886.75	2159.78	909	2	3	1	388.606	571.394	960
1589	2	7	2	5	886.75	3033.85	916.286	1	3	1	320.432	288.568	609
1590	0	12	5	9	886.75	2641.54	865.857	2	3	1	320.432	712.568	1033
1591	0	13	6	9	1184.36	3465.38	886.75	2	4	1	296.131	843.869	1140
1592	0	11	5	8	1184.36	2615.38	901.75	2	3	1	350.664	609.336	960
1593	0	10	4	6	1184.36	2842.53	899.875	2	3	1	401.969	498.031	900
1594	1	14	6	11	1184.36	2510.77	899.889	2	3	1	441.685	870.315	1312
1595	1	12	5	8	1184.36	2798.33	941.1	2	3	2	377.932	709.068	1087
1596	1	15	8	14	1184.36	4195.99	954.364	3	5	1	922.696	622.304	1545
1597	1	14	6	11	1184.36	2468.79	1003.58	2	3	2	350.664	829.336	1180
1598	3	15	10	16	1184.36	4123.42	1017.15	3	5	1	922.696	739.304	1662
1599	1	13	5	11	1184.36	3530.77	1075.77	2	4	1	396.029	683.971	1080
1600	2	12	6	10	1184.36	2550	1137.09	2	3	1	381.27	610.73	992
1601	1	14	8	12	1184.36	2118.46	1171.91	2	3	1	388.606	781.394	1170
1602	3	14	10	16	1009	4184.62	1188.8	3	5	2	922.696	536.304	1459
1603	4	11	4	6	1009	2802.91	1213.36	1	3	1	401.969	242.031	644
1604	1	12	7	11	1009	2907.52	1165.92	2	3	1	401.969	716.031	1118
1605	1	11	8	11	1009	2615.38	1179.08	2	3	1	350.664	789.336	1140
1606	2	11	6	9	1009	2210	1176.08	2	3	1	388.606	499.394	888
1607	0	8	5	7	1009	2157.69	1128.11	2	3	1	336.137	443.863	780
1608	1	9	7	13	1009	3060	1093.3	2	4	1	298.498	1062.5	1361
1609	1	6	4	6	1009	2249.23	1061.33	2	3	1	388.606	347.394	736
1610	0	4	3	8	1009	2536.92	1032.89	2	3	1	350.664	604.336	955
1611	0	3	2	6	652.333	2228.96	976.667	2	3	1	388.606	320.394	709
1612	0	1	1	6	652.333	2265.97	908.2	2	3	1	336.137	263.863	600
1613	0	1	0	6	652.333	2159.78	754.667	2	3	1	388.606	259.394	648
1614	0	1	1	7	866.833	2545.29	652.333	2	3	1	320.432	399.568	720
1615	1	4	1	10	866.833	2545.42	656	2	3	1	381.27	639.73	1021
1616	1	5	2	9	866.833	2574.19	796.333	3	3	1	350.664	662.336	1013
1617	2	3	0	5	866.833	2981.54	850.5	1	3	1	377.932	121.068	499
1618	0	6	3	8	866.833	2777.15	780.2	2	3	2	401.969	525.031	927
1619	0	6	3	9	866.833	4251.57	836	3	5	2	922.696	98.3042	1021
1620	1	6	4	12	967	3664.81	896.2	2	4	1	480.998	848.002	1329
1621	1	4	2	4	967	2249.23	968.333	2	3	1	388.606	151.394	540
1622	0	4	2	9	967	4137.02	944.2	2	4	2	542.141	563.859	1106
1623	0	2	1	7	967	3590.79	980	2	4	1	480.998	475.002	956
1624	0	3	2	6	963.75	2510.77	876.5	2	3	1	320.432	379.568	700
1625	0	2	1	6	963.75	2615.38	920.667	2	3	1	350.664	328.336	679
1626	0	2	1	7	963.75	4055.94	860.25	3	5	1	922.696	275.304	1198
1627	0	1	1	8	963.75	4106.15	859	3	5	1	922.696	355.304	1278
1628	0	0	0	7	1253	3896.92	0	3	5	1	922.696	330.304	1253
1629	1	5	1	6	1445	4184.62	1253	3	5	1	922.696	522.304	1445
1630	1	5	0	5	1183	4251.57	1445	3	5	1	922.696	117.304	1040
1631	0	5	2	5	1183	1713.08	1242.5	4	2	2	285.463	975.537	1261
1632	0	5	3	4	1183	3181.88	1248.67	4	4	2	368.444	843.556	1212
1633	0	7	4	2	1183	3268.97	1239.5	4	4	2	368.444	695.556	1064
1634	0	8	5	3	1183	3756.22	1204.4	4	4	2	480.998	580.002	1061
1635	0	4	2	5	1183	2907.52	1180.5	2	3	1	401.969	732.031	1134
1636	0	5	3	8	1183	2170.77	1128.67	4	4	2	480.998	1028	1509
1637	0	4	3	6	1312.6	3112.31	1196	4	4	1	368.444	944.556	1313
1638	0	6	2	3	1312.6	2777.15	1318.67	2	3	1	401.969	609.031	1011
1639	1	6	2	2	1312.6	4066.92	1162	3	5	1	922.696	160.304	1083
1640	1	6	1	2	1312.6	1085.38	1135.67	2	5	1	492.098	413.902	906
1641	1	7	4	7	1312.6	3020.77	1078.25	3	4	2	368.444	1881.56	2250
1642	1	7	3	1	1805.25	2937.6	1312.5	2	3	1	401.969	590.031	992
1643	0	7	4	8	1805.25	4055.94	1248.4	3	5	1	922.696	1324.3	2247
1644	0	7	5	9	1805.25	4236.92	1414.83	3	5	1	922.696	1225.3	2148
1645	0	5	4	8	1805.25	4106.15	1604.33	3	5	1	922.696	911.304	1834
1646	0	5	3	4	1024.67	4306.75	1991	3	5	1	922.696	276.304	1199
1647	0	3	2	1	1024.67	3439.23	1042	4	4	2	480.998	509.002	990
1648	0	4	2	1	1001.67	3896.92	1024.67	3	5	1	922.696	150.304	1073
1649	0	2	1	1	1001.67	3664.81	982.667	4	4	2	480.998	669.002	1150
1650	1	6	1	2	1075.25	4251.57	966	3	5	1	922.696	26.3042	949
1651	1	7	2	1	1075.25	2210	960.333	2	3	1	388.606	608.394	997
1652	2	5	0	1	1075.25	1858.62	969.5	2	3	1	271.833	348.167	620
1653	0	9	3	1	1075.25	3478.46	837	2	4	1	595.125	592.875	1188
1654	1	11	5	2	1075.25	4251.57	907.2	3	5	1	922.696	426.304	1349
1655	1	10	4	2	1075.25	2484.62	980.833	2	3	1	381.27	716.73	1098
1656	0	10	5	2	1075.25	2301.54	1033.5	2	3	1	336.137	806.863	1143
1657	1	11	6	3	1075.25	3727.58	1049.14	2	4	2	595.125	662.875	1258
1658	1	10	4	2	895.889	2265.97	1075.25	2	3	1	336.137	517.863	854
1659	0	11	6	4	895.889	2545.42	1050.67	2	3	1	381.27	700.73	1082
1660	0	10	6	3	895.889	2278.78	1053.8	2	3	1	336.137	665.863	1002
1661	1	11	7	2	895.889	2728.76	1049.09	2	3	1	532.915	606.085	1139
1662	1	10	6	2	895.889	4236.92	1123.67	3	5	2	922.696	80.3042	1003
1663	2	7	4	2	895.889	2545.42	1111.6	1	3	1	320.432	292.568	613
1664	0	10	5	0	895.889	2236.15	1011.75	2	3	1	444.958	208.042	653
1665	2	15	5	0	895.889	4137.02	950.5	2	4	1	542.141	501.859	1044
1666	1	11	3	0	895.889	2157.69	960.889	2	3	1	336.137	336.863	673
1667	1	14	5	1	1170.08	2576.15	895.889	2	3	1	441.685	519.315	961
1668	2	10	2	0	1170.08	2236.15	902.4	2	2	1	272.182	327.818	600
1669	4	15	9	2	1170.08	3811.4	874.909	2	4	1	595.125	1017.87	1613
1670	1	12	4	1	1170.08	2545.29	943.909	2	3	1	320.432	526.568	847
1671	1	13	5	1	1170.08	3583.08	935.833	2	4	1	410.583	549.417	960
1672	2	13	7	2	1170.08	4053.85	925.667	2	4	1	542.141	754.859	1297
1673	2	13	6	1	1170.08	2183.85	954.231	2	3	1	465.192	374.808	840
1674	2	18	10	3	1170.08	2118.46	925.333	2	3	1	388.606	1134.39	1523
1675	2	15	8	3	1170.08	2615.38	971.308	2	3	1	350.664	969.336	1320
1676	2	12	7	2	1170.08	1830.77	996.214	2	3	1	438.014	667.986	1106
1677	0	18	10	3	1170.08	2510.77	1003.53	2	3	1	441.685	979.315	1421
1678	1	18	9	2	1170.08	2316.45	1061.29	2	3	1	381.27	993.73	1375
1679	4	18	10	3	1170.08	2301.54	1112.86	2	4	1	595.125	752.875	1348
1680	2	11	3	0	865.062	2419.23	1203.7	1	2	1	272.182	112.818	385
1681	3	15	7	1	865.062	2157.69	1129.27	1	3	1	336.137	507.863	844
1682	2	13	5	0	865.062	3191.29	1105.5	1	4	1	368.444	198.556	567
1683	3	18	10	2	865.062	3590.79	1093.27	2	4	2	480.998	773.002	1254
1684	3	19	11	2	865.062	2013.85	1089.36	2	3	1	444.958	843.042	1288
1685	4	12	4	0	865.062	2471.54	1105.92	1	2	1	272.182	258.818	531
1686	3	17	11	3	865.062	2798.33	1080.17	2	3	1	377.932	898.068	1276
1687	3	19	11	4	865.062	3665.85	1095.23	2	4	2	410.583	1008.42	1419
1688	4	13	5	2	865.062	2523.85	1087.23	1	3	1	381.27	216.73	598
1689	4	11	4	2	865.062	2468.79	989.545	1	3	2	350.664	164.336	515
1690	2	13	6	2	865.062	2131.54	950	1	3	1	444.958	222.042	667
1691	1	17	9	2	865.062	2574.19	891	1	3	1	350.664	563.336	914
1692	1	15	7	2	865.062	2445.38	892.769	1	4	1	443.577	370.423	814
1693	3	18	10	3	865.062	2510.77	887.143	2	3	1	320.432	939.568	1260
1694	1	15	7	2	865.062	2340.77	912	1	2	1	272.182	486.818	759
1695	1	15	7	2	865.062	2393.08	902.438	1	3	1	381.27	368.73	750
1696	1	13	5	1	916.143	3033.85	865.062	1	3	1	320.432	311.568	632
1697	1	15	8	2	916.143	1739.23	851.353	2	3	1	438.014	544.986	983
1698	1	16	9	1	916.143	2066.15	858.667	2	2	2	272.182	663.818	936
1699	2	16	10	3	916.143	2301.54	891.941	2	3	1	532.915	593.085	1126
1700	3	12	5	1	916.143	2228.96	904.25	1	3	1	388.606	158.394	547
1701	3	15	11	5	916.143	2641.54	879.733	1	3	1	320.432	973.568	1294
1702	2	13	8	4	916.143	2159.78	905.625	2	3	1	388.606	631.394	1020
1703	2	13	10	5	916.143	2236.15	854.333	2	3	2	336.137	750.863	1087
1704	4	11	4	1	916.143	1581.39	886.933	1	1	1	305.267	153.733	459
1705	2	10	5	4	916.143	2802.91	883.2	1	3	1	401.969	315.031	717
1706	0	12	7	6	916.143	2777.15	886.533	2	3	2	401.969	636.031	1038
1707	1	13	8	6	916.143	2157.69	896	2	3	1	381.27	878.73	1260
1708	1	9	4	3	916.143	3724.7	911.462	1	4	2	410.583	296.417	707
1709	1	10	4	6	916.143	2944.4	908.154	2	3	1	401.969	618.031	1020
1710	1	7	3	2	878.467	1900.99	914.9	2	2	1	285.463	134.537	420
1711	0	11	5	5	878.467	2079.23	902.2	2	3	1	444.958	340.042	785
1712	1	13	6	7	878.467	2890	891.545	1	1	1	305.267	754.733	1060
1713	1	10	4	5	878.467	3556.92	855.3	1	4	2	396.029	272.971	669
1714	2	14	6	7	878.467	2615.38	813.5	2	3	1	350.664	729.336	1080
1715	2	12	5	4	878.467	1778.46	875.6	2	3	1	438.014	401.986	840
1716	2	10	4	3	878.467	2937.6	872.364	1	3	1	401.969	281.031	683
1717	1	14	7	5	878.467	2066.15	869.273	2	3	1	388.606	691.394	1080
1718	2	17	8	8	878.467	3530.77	834.4	2	4	2	396.029	803.971	1200
1719	2	14	6	5	878.467	3190.77	867.636	2	4	2	368.444	536.556	905
1720	2	17	9	7	878.467	3295.38	870.75	2	4	1	298.498	901.502	1200
1721	3	15	9	7	878.467	2842.53	911.833	2	3	1	401.969	839.031	1241
1722	5	9	2	2	878.467	2288.46	937.154	2	2	1	272.182	87.8183	360
1723	2	14	5	4	878.467	2785.38	895.929	1	1	1	305.267	414.733	720
1724	1	14	7	6	878.467	1530	884.2	2	3	1	438.014	495.986	934
1725	0	13	7	6	881.643	3459.63	878.467	1	4	1	296.131	574.869	871
1726	2	15	9	9	881.643	3504.62	908.533	2	4	1	480.998	736.002	1217
1727	1	12	7	5	881.643	2785.38	928.571	1	1	1	305.267	551.733	857
1728	1	13	7	5	881.643	2550	923.8	2	3	1	381.27	578.73	960
1729	2	18	11	8	881.643	3504.62	926.062	1	4	1	296.131	1036.87	1333
1730	2	15	9	7	881.643	3007.69	950	3	4	1	368.444	801.556	1170
1731	3	14	9	6	881.643	2981.54	997.538	2	3	1	377.932	728.068	1106
1732	3	9	2	3	881.643	1974.62	990.308	1	2	1	285.463	96.5372	382
1733	2	12	6	4	881.643	2545.29	950.077	1	3	1	320.432	353.568	674
1734	2	10	4	3	881.643	1539.55	909.615	1	1	1	305.267	185.733	491
1735	0	12	6	5	881.643	2563.08	879.714	2	4	1	342.592	437.408	780
1736	0	13	7	4	881.643	3713.85	884.231	1	4	1	443.577	367.423	811
1737	1	11	7	4	881.643	2907.52	891.231	2	3	1	401.969	498.031	900
1738	1	11	6	4	881.643	2545.42	888.615	1	3	1	320.432	470.568	791
1739	0	11	6	5	736.583	1909.23	882.462	2	3	2	271.833	533.167	805
1740	1	11	6	2	736.583	3338.54	850.25	2	4	1	298.498	541.502	840
1741	1	12	7	3	736.583	2249.23	849.462	2	3	1	388.606	601.394	990
1742	2	9	4	2	736.583	2026.92	779.091	2	2	1	285.463	254.537	540
1743	3	12	7	3	736.583	3478.46	759.167	2	4	1	595.125	424.875	1020
1744	2	9	5	3	736.583	3910	779.231	2	4	1	443.577	336.423	780
1745	2	8	3	2	736.583	2867.51	754.154	1	3	1	377.932	234.068	612
1746	1	8	4	3	736.583	3756.22	744	1	4	1	480.998	138.002	619
1747	0	13	5	2	736.583	2667.69	767.615	1	3	2	230.966	440.034	671
1748	3	16	8	2	736.583	1765.38	781.462	2	3	2	271.833	718.167	990
1749	1	11	3	0	736.583	2468.79	787.091	1	3	1	350.664	28.3357	379
1750	2	12	4	0	736.583	3452.31	749.636	1	4	1	396.029	196.971	593
1751	8	20	13	6	928.647	3556.92	736.583	2	4	2	396.029	1065.97	1462
1752	3	10	2	0	928.647	2576.15	792.385	2	4	1	342.592	17.4078	360
1753	6	16	10	5	928.647	4276.15	761.5	2	4	1	542.141	657.859	1200
1754	3	14	6	3	928.647	1896.15	790.733	2	3	1	444.958	389.042	834
1755	3	12	5	2	928.647	2746.15	792.667	1	1	1	305.267	312.733	618
1756	4	14	8	5	928.647	2680.77	781.75	2	4	1	342.592	677.408	1020
1757	4	13	6	5	928.647	2265.97	793	2	3	1	336.137	443.863	780
1758	4	11	4	4	928.647	1739.23	779.875	1	2	1	285.463	339.537	625
1759	1	13	7	5	928.647	2798.33	785.188	2	3	1	377.932	503.068	881
1760	1	13	8	4	928.647	2210	790.824	2	2	2	272.182	687.818	960
1761	1	13	7	3	928.647	3465.38	787.75	1	4	1	296.131	418.869	715
1762	0	13	7	3	928.647	4066.92	805.867	1	4	1	443.577	461.423	905
1763	1	12	7	5	928.647	3962.31	812.062	2	4	1	443.577	588.423	1032
1764	1	10	5	2	928.647	2615.38	834.625	1	3	1	350.664	414.336	765
1765	3	13	9	8	928.647	2692.15	830.529	2	3	1	320.432	1239.57	1560
1766	0	11	6	6	928.647	3665.85	830.529	2	4	1	410.583	729.417	1140
1767	1	11	4	6	928.647	2942.31	928.562	2	4	1	368.444	561.556	930
1768	1	11	5	5	795.9	3818.46	928.647	2	4	1	443.577	516.423	960
1769	1	11	6	5	795.9	3060	984.8	2	4	1	298.498	541.502	840
1770	2	8	3	1	795.9	2837.69	980.7	1	1	1	305.267	30.7326	336
1771	0	11	6	3	795.9	3896.92	922.091	1	4	1	443.577	242.423	686
1772	1	10	7	5	795.9	2484.62	897.182	2	3	1	381.27	354.73	736
1773	1	10	6	4	795.9	2802.91	883.75	2	3	1	401.969	203.031	605
1774	0	9	4	5	795.9	3724.7	871.818	1	4	1	410.583	341.417	752
1775	2	12	7	9	795.9	2157.69	861.833	2	3	1	336.137	996.863	1333
1776	1	8	4	6	795.9	2545.42	898	2	3	1	381.27	488.73	870
1777	1	8	2	5	795.9	3753.08	804.8	1	4	1	443.577	397.423	841
1778	0	8	4	6	825	2353.85	777.667	2	2	2	272.182	567.818	840
1779	1	10	6	6	825	3033.85	783.9	2	3	1	320.432	759.568	1080
1780	1	8	3	4	825	2079.23	807.9	2	2	1	272.182	387.818	660
1781	1	11	6	8	825	4393.85	794.455	1	4	1	542.141	496.859	1039
1782	1	10	5	4	825	3583.08	814.833	2	4	1	480.998	239.002	720
1783	0	8	4	8	825	2772.31	903.889	2	3	1	230.966	595.034	826
1784	2	9	7	10	825	2066.15	896.1	2	3	1	388.606	705.394	1094
1785	2	7	6	9	825	2393.08	930.3	2	3	1	381.27	531.73	913
1786	2	6	3	7	825	4184.62	928.727	1	4	1	542.141	6.85881	549
1787	2	6	3	6	825	2615.38	857.455	1	3	1	350.664	178.336	529
1788	0	3	3	3	820.667	2867.51	825	1	3	1	377.932	148.068	526
1789	1	5	1	3	820.667	2641.54	736.714	2	3	1	320.432	279.568	600
1790	1	6	2	5	820.667	3556.92	719.625	2	4	1	396.029	442.971	839
1791	2	4	0	1	820.667	3138.46	732.889	1	4	1	368.444	33.5559	402
1792	0	8	3	5	820.667	2228.96	681.5	2	3	1	388.606	287.394	676
1793	1	12	5	7	820.667	2615.38	629.25	2	3	1	350.664	663.336	1014
1794	1	15	5	7	820.667	3465.38	672	2	4	1	296.131	903.869	1200
1795	2	15	6	7	820.667	1858.62	751	2	3	1	271.833	763.167	1035
1796	2	13	3	5	820.667	3459.63	786.5	2	4	1	296.131	582.869	879
1797	0	13	5	6	820.667	2907.52	756.9	2	3	1	401.969	533.031	935
1798	1	16	7	8	820.667	4472.31	773.091	2	4	2	542.141	801.859	1344
1799	4	18	11	10	1042.64	3338.54	847.455	2	4	1	298.498	1225.5	1524
1800	2	13	6	5	1042.64	1556.15	903.833	1	1	1	305.267	486.733	792
1801	3	16	10	9	1042.64	2545.29	895.231	2	3	1	320.432	1179.57	1500
1802	4	16	8	6	1042.64	2236.15	938.429	2	3	1	336.137	696.863	1033
1803	4	15	7	5	1042.64	2523.85	944.733	1	3	1	381.27	577.73	959
1804	4	14	6	4	1042.64	2574.19	945.625	1	3	1	350.664	459.336	810
1805	1	18	12	9	1042.64	2615.38	937.647	2	3	1	350.664	977.336	1328
1806	1	13	8	6	1042.64	2159.78	1028.47	2	3	1	388.606	691.394	1080
1807	2	16	10	6	1042.64	3583.08	1055.4	2	4	1	410.583	914.417	1325
1808	3	13	6	5	1042.64	2510.77	1067.29	1	3	1	320.432	322.568	643
1809	1	14	7	4	1042.64	2842.53	1039	2	3	1	401.969	438.031	840
1810	0	13	8	4	1042.64	2157.69	1026	2	3	1	336.137	632.863	969
1811	0	12	6	1	1042.64	2937.6	1066.92	2	3	1	401.969	378.031	780
1812	1	14	8	4	1042.64	3452.31	1044.85	2	4	1	396.029	617.971	1014
1813	1	10	4	3	774.2	2210	980.091	1	3	1	388.606	257.394	646
1814	2	13	8	6	774.2	2798.33	952.25	2	3	1	377.932	657.068	1035
1815	2	11	7	5	774.2	2692.15	958.615	2	3	1	320.432	528.568	849
1816	2	8	3	4	774.2	2944.4	918.1	1	3	1	401.969	48.0311	450
1817	0	10	6	6	774.2	2545.42	875.545	2	3	1	320.432	519.568	840
1818	0	10	6	5	774.2	2278.78	872.583	2	3	1	336.137	424.863	761
1819	0	9	6	5	774.2	3504.62	846	2	4	1	296.131	483.869	780
1820	1	7	5	6	774.2	2265.97	814.909	2	3	1	336.137	418.863	755
1821	1	6	4	4	774.2	2615.38	807.182	2	3	1	350.664	189.336	540
1822	1	12	5	9	774.2	3530.77	768.182	2	4	2	396.029	689.971	1086
1823	1	6	1	5	889.938	1830.77	774.2	1	3	1	438.014	260.986	699
1824	0	11	2	5	889.938	1935.38	767.364	2	3	1	444.958	427.042	872
1825	4	14	7	7	889.938	3665.85	776.083	2	4	1	410.583	873.417	1284
1826	2	12	4	4	889.938	3181.88	806.7	2	4	2	368.444	445.556	814
1827	2	12	5	3	889.938	2249.23	807.364	2	3	1	388.606	451.394	840
1828	3	11	2	1	889.938	2183.85	843.1	2	2	1	272.182	87.8183	360
1829	1	15	7	3	889.938	2157.69	799.182	1	3	1	381.27	479.73	861
1830	5	20	12	6	889.938	2777.15	804.333	2	3	2	401.969	1058.03	1460
1831	5	17	10	4	889.938	2550	870.091	2	3	1	381.27	849.73	1231
1832	5	16	9	3	889.938	2867.51	900.167	2	3	1	377.932	642.068	1020
1833	5	11	4	2	889.938	3295.38	909.385	2	4	1	298.498	44.5021	343
1834	3	13	6	2	889.938	2118.46	868.929	2	3	1	388.606	228.394	617
1835	3	10	4	0	889.938	3556.92	859.071	1	4	2	396.029	131.971	528
1836	3	17	10	7	889.938	3060	858.214	2	4	1	298.498	1201.5	1500
1837	2	14	7	4	889.938	2432.31	901	1	3	1	441.685	550.315	992
1838	2	14	6	3	889.938	2772.31	906.688	2	3	2	230.966	587.034	818
1839	1	13	7	7	939.545	3465.38	902.667	2	4	1	296.131	750.869	1047
1840	2	12	5	4	939.545	2536.92	911.688	1	3	1	350.664	295.336	646
1841	1	12	8	9	939.545	2981.54	871.8	2	3	2	377.932	820.068	1198
1842	1	12	8	8	939.545	1935.38	897.4	2	2	2	285.463	883.537	1169
1843	1	14	9	9	939.545	2105.38	919.333	2	3	1	465.192	914.808	1380
1844	3	10	5	5	939.545	2641.54	948.125	1	3	1	320.432	481.568	802
1845	0	11	7	7	939.545	3465.38	949.357	2	4	1	296.131	725.869	1022
1846	0	12	7	6	939.545	2545.42	934.429	2	3	1	381.27	702.73	1084
1847	1	8	5	3	939.545	2785.38	1018.44	1	3	1	320.432	365.568	686
1848	1	7	3	2	939.545	3073.08	1003.78	1	4	1	368.444	152.556	521
1849	0	8	5	5	939.545	2728.76	955.5	2	3	1	532.915	247.085	780
1850	0	10	4	7	920.583	2615.38	939.545	2	3	1	350.664	549.336	900
1851	1	12	6	8	920.583	3727.58	926.182	2	4	2	595.125	424.875	1020
1852	1	10	4	7	920.583	3724.7	851.875	2	4	2	410.583	511.417	922
1853	0	10	4	6	920.583	2615.38	805.778	2	3	1	350.664	429.336	780
1854	3	13	8	9	920.583	2316.45	778.889	2	3	1	381.27	978.73	1360
1855	2	11	6	7	920.583	2937.6	837	2	3	1	401.969	728.031	1130
1856	2	10	6	7	920.583	2236.15	841.6	2	3	2	336.137	756.863	1093
1857	1	11	7	8	920.583	2301.54	864.455	2	3	1	532.915	671.085	1204
1858	4	8	2	2	920.583	2798.46	892.75	1	1	1	305.267	131.733	437
1859	1	11	7	6	920.583	2545.29	872	2	3	1	320.432	723.568	1044
1860	1	10	5	5	920.583	2157.69	885.231	2	3	1	336.137	503.863	840
1861	1	8	5	4	912.143	2944.4	912.7	2	3	1	401.969	378.031	780
1862	1	8	4	3	912.143	1765.38	900.636	1	3	2	271.833	287.167	559
1863	0	6	4	6	912.143	2278.78	867.636	2	3	1	336.137	503.863	840
1864	0	8	5	8	912.143	3811.4	865.333	2	4	1	595.125	448.875	1044
1865	1	11	5	10	912.143	3556.92	939.182	2	4	2	396.029	1050.97	1447
1866	2	9	4	7	912.143	3674.62	936.286	2	4	2	595.125	461.875	1057
1867	2	7	1	4	912.143	2907.52	951.375	1	3	1	401.969	256.031	658
1868	1	8	2	3	804.733	2867.51	912.143	1	3	1	377.932	216.068	594
1869	1	9	5	4	804.733	2393.08	872.375	2	3	1	381.27	493.73	875
1870	1	12	6	6	804.733	3295.38	872.667	2	4	1	298.498	798.502	1097
1871	1	13	7	6	804.733	2798.33	895.1	2	3	2	377.932	720.068	1098
1872	3	8	3	2	804.733	1909.23	967.778	1	2	1	285.463	105.537	391
1873	1	13	7	5	804.733	2249.23	910.1	2	3	1	388.606	652.394	1041
1874	1	13	6	5	804.733	2842.53	917.556	2	3	1	401.969	558.031	960
1875	2	12	6	5	804.733	2316.45	863.444	2	3	1	381.27	478.73	860
1876	3	8	2	2	804.733	2468.79	863.1	1	3	2	350.664	64.3357	415
1877	1	11	5	3	804.733	2228.96	822.364	2	3	1	388.606	217.394	606
1878	0	11	6	4	804.733	1778.46	804.333	2	3	1	438.014	341.986	780
1879	1	11	7	5	804.733	2523.85	802.462	1	3	1	381.27	393.73	775
1880	1	9	5	4	804.733	2210	780.769	2	3	1	388.606	210.394	599
1881	2	13	8	6	804.733	3583.08	776.231	2	4	1	410.583	729.417	1140
1882	2	12	7	5	804.733	2667.69	802.214	2	3	1	532.915	307.085	840
1883	2	7	4	4	757.2	2510.77	804.733	1	3	1	320.432	214.568	535
1884	0	8	4	3	757.2	2545.42	745.167	1	3	1	320.432	474.568	795
1885	4	10	7	6	757.2	889.231	755	2	5	1	492.098	785.902	1278
1886	3	10	5	5	757.2	2157.69	798.583	2	3	1	381.27	583.73	965
1887	2	8	3	4	757.2	2615.38	811.385	1	3	1	350.664	294.336	645
1888	2	9	5	5	757.2	2667.69	787.154	2	3	2	230.966	598.034	829
1889	1	7	5	4	757.2	3338.54	815.583	1	4	1	298.498	512.502	811
1890	0	7	5	5	757.2	2981.54	790.091	2	3	2	377.932	282.068	660
1891	0	7	5	7	757.2	2159.78	795.636	2	3	1	388.606	411.394	800
1892	0	4	2	3	825.444	2641.54	781.889	1	3	1	320.432	65.5676	386
1893	1	5	3	7	825.444	2157.69	736.444	2	3	1	336.137	472.863	809
1894	1	7	3	11	825.444	3530.77	612.625	2	4	2	396.029	857.971	1254
1895	1	7	2	9	825.444	4550.77	665.75	2	4	2	542.141	514.859	1057
1896	1	8	3	9	825.444	3459.63	759.714	2	4	1	296.131	711.869	1008
1897	1	7	2	8	825.444	3033.85	790.75	2	3	1	320.432	555.568	876
1898	1	8	5	7	825.444	3556.92	820.286	2	4	2	396.029	601.971	998
1899	1	8	4	6	825.444	2484.62	842.5	2	3	1	381.27	307.73	689
1900	1	7	5	6	905.875	3465.38	880.375	2	4	1	296.131	603.869	900
1901	1	6	4	6	905.875	2574.19	882.556	2	3	1	350.664	407.336	758
1902	0	9	5	6	905.875	2545.42	876.889	2	3	1	381.27	596.73	978
1903	0	6	2	3	905.875	3665.85	886.714	1	4	2	410.583	179.417	590
1904	0	8	2	6	905.875	2692.15	849.625	2	3	1	320.432	550.568	871
1905	0	9	3	6	905.875	2079.23	832.5	1	3	1	444.958	439.042	884
1906	0	11	4	7	905.875	2236.15	833.5	2	3	2	336.137	686.863	1023
1907	2	13	6	8	905.875	2301.54	854.556	2	4	1	595.125	647.875	1243
1908	2	13	6	7	814.727	2118.46	905.875	2	3	1	388.606	632.394	1021
1909	2	10	3	3	814.727	2536.92	918.667	1	3	1	350.664	283.336	634
1910	2	10	4	4	814.727	4137.02	890.2	1	4	1	542.141	166.859	709
1911	0	12	6	6	814.727	2615.38	883.667	2	3	1	350.664	507.336	858
1912	1	12	7	7	814.727	2944.4	870.333	2	3	1	401.969	599.031	1001
1913	1	12	8	7	814.727	3060	883.4	2	4	1	298.498	705.502	1004
1914	1	11	8	7	814.727	2316.45	894.364	2	3	1	381.27	579.73	961
1915	3	9	3	2	814.727	2228.96	899.917	1	3	1	388.606	45.3941	434
1916	0	9	7	6	814.727	2157.69	864.077	2	3	1	336.137	501.863	838
1917	1	8	8	6	814.727	2510.77	883.154	2	3	1	320.432	582.568	903
1918	1	6	5	5	814.727	2615.38	885.615	1	3	1	350.664	248.336	599
1919	0	1	0	2	463.667	2641.54	751	1	3	1	320.432	51.5676	372
1920	0	2	1	3	463.667	3465.38	485.5	1	4	1	296.131	343.869	640
1921	0	1	1	2	463.667	2772.31	506	1	3	2	230.966	148.034	379
1922	0	4	0	6	739.545	2053.08	463.667	2	3	1	465.192	314.808	780
1923	1	8	2	7	739.545	2159.78	542.75	2	3	1	388.606	503.394	892
1924	1	5	1	4	739.545	1858.62	612.6	2	3	2	271.833	328.167	600
1925	1	8	4	6	739.545	2867.51	610.5	2	3	1	377.932	414.068	792
1926	1	8	3	4	739.545	2907.52	636.429	1	3	1	401.969	69.0311	471
1927	2	12	6	6	739.545	2265.97	615.75	2	3	1	336.137	563.863	900
1928	2	10	4	5	739.545	2574.19	681.75	2	3	1	350.664	426.336	777
1929	2	8	3	3	739.545	2523.85	692.333	1	3	1	381.27	166.73	548
1930	1	12	7	6	739.545	2157.69	682.111	2	3	1	381.27	470.73	852
1931	2	11	6	6	739.545	3713.85	699.1	2	4	1	443.577	419.423	863
1932	2	9	5	5	739.545	3465.38	747.5	2	4	1	296.131	363.869	660
1933	0	12	6	6	794.5	2278.78	697.5	2	3	1	336.137	456.863	793
1934	1	12	7	8	794.5	3556.92	704.846	2	4	2	396.029	530.971	927
1935	1	11	5	6	794.5	2550	720.714	2	3	1	381.27	398.73	780
1936	1	12	5	6	794.5	2545.29	716.5	2	3	1	320.432	443.568	764
1937	1	9	4	5	794.5	3665.85	720.154	1	4	2	410.583	156.417	567
1938	0	12	5	6	794.5	2236.15	709.214	2	3	2	336.137	421.863	758
1939	3	13	9	10	794.5	2981.54	706.786	3	3	2	377.932	832.068	1210
1940	2	11	6	6	794.5	2937.6	740.333	2	3	1	401.969	498.031	900
1941	2	11	7	7	794.5	2536.92	758.231	2	3	1	350.664	563.336	914
1942	3	8	2	3	794.5	2066.15	786.385	1	3	1	388.606	28.3941	417
1943	3	13	9	10	794.5	2484.62	760	2	3	1	381.27	1046.73	1428
1944	3	8	4	4	794.5	2157.69	804.533	1	3	1	336.137	165.863	502
1945	1	11	6	7	794.5	2667.69	781.2	2	3	2	230.966	697.034	928
1946	2	12	6	9	1014.73	3727.58	837.538	2	4	1	595.125	664.875	1260
1947	2	7	2	3	1014.73	2785.38	877.091	1	3	1	320.432	113.568	434
1948	1	10	5	8	1014.73	1713.08	840.167	2	2	2	285.463	881.537	1167
1949	2	9	3	5	1014.73	3811.4	865.308	2	4	1	595.125	143.875	739
1950	0	10	5	7	1014.73	2301.54	888.083	2	4	1	595.125	442.875	1038
1951	3	14	7	12	1014.73	3583.08	882.7	2	4	1	410.583	1269.42	1680
1952	2	10	5	6	1014.73	3910	955.182	2	4	1	443.577	456.423	900
1953	1	9	4	5	1014.73	2545.42	955.182	2	3	1	320.432	459.568	780
1954	1	14	7	11	1014.73	2615.38	986.909	2	3	1	350.664	1103.34	1454
1955	2	14	7	13	1014.73	2798.33	984.2	2	3	2	377.932	942.068	1320
1956	2	14	6	11	1385.62	2641.54	1014.73	2	3	1	320.432	812.568	1133
1957	2	13	4	8	1385.62	2157.69	1003.18	1	3	1	336.137	540.863	877
1958	0	13	5	12	1385.62	2837.69	1043.45	1	1	1	305.267	782.733	1088
1959	9	23	15	27	1385.62	2615.38	1066	2	3	1	350.664	2371.34	2722
1960	2	15	7	12	1385.62	2170.77	1234.4	4	4	2	480.998	665.002	1146
1961	3	15	8	14	1385.62	2118.46	1226.36	2	3	1	388.606	956.394	1345
1962	3	13	4	10	1385.62	2316.45	1195.91	1	3	1	381.27	545.73	927
1963	2	13	6	12	1385.62	3459.63	1173.5	1	4	1	296.131	857.869	1154
1964	1	14	8	16	1385.62	2393.08	1172	2	3	1	381.27	1004.73	1386
1965	2	16	7	14	1385.62	2510.77	1245.17	2	3	1	320.432	1201.57	1522
1966	2	16	8	15	1385.62	3556.92	1250.83	2	4	2	396.029	1165.97	1562
1967	2	16	8	14	1385.62	2615.38	1274.77	2	3	1	350.664	1150.34	1501
1968	1	19	10	14	1385.62	3465.38	1363.58	2	4	1	296.131	1353.87	1650
1969	5	11	2	6	1092.09	2615.38	1491.5	1	3	1	350.664	146.336	497
1970	3	17	9	10	1092.09	3831.54	1269	2	4	2	443.577	1056.42	1500
1971	3	17	8	8	1092.09	2545.42	1290	2	3	1	381.27	866.73	1248
1972	3	17	7	6	1092.09	3295.38	1286.5	1	4	1	298.498	867.502	1166
1973	3	18	12	12	1092.09	2777.15	1277.23	2	3	2	401.969	1227.03	1629
1974	4	14	5	4	1092.09	2867.51	1311.83	1	3	1	377.932	450.068	828
1975	2	15	8	9	1092.09	2159.78	1310.3	2	3	1	388.606	776.394	1165
1976	2	16	10	10	1092.09	3504.62	1274.6	2	4	1	296.131	1030.87	1327
1977	3	12	5	4	1092.09	2842.53	1223.33	1	3	1	401.969	182.031	584
1978	1	15	8	8	1092.09	3665.85	1159.4	2	4	1	410.583	560.417	971
1979	0	15	9	9	1092.09	2468.79	1142.27	2	3	2	350.664	747.336	1098
1980	0	13	9	10	981.4	2157.69	1092.09	2	3	1	381.27	818.73	1200
1981	0	13	9	9	981.4	2249.23	1092.09	2	3	1	388.606	691.394	1080
1982	0	10	7	6	981.4	2907.52	1099.46	1	3	1	401.969	518.031	920
1983	1	10	7	6	981.4	2210	1101.33	2	3	1	388.606	508.394	897
1984	1	9	6	4	981.4	2265.97	1072.08	1	3	1	336.137	430.863	767
1985	0	10	6	5	981.4	3060	1000.9	1	4	1	298.498	448.502	747
1986	0	10	3	7	981.4	3338.54	918.222	1	4	1	298.498	492.502	791
1987	0	12	3	7	981.4	2278.78	905.5	2	3	1	336.137	579.863	916
1988	1	12	4	8	981.4	2523.85	935.111	2	3	1	381.27	598.73	980
1989	4	16	8	12	981.4	3583.08	922	2	4	1	410.583	1105.42	1516
1990	2	12	4	6	1023.5	2157.82	941.75	2	3	1	465.192	434.808	900
1991	3	10	2	3	1023.5	2937.6	937.111	1	3	1	401.969	79.0311	481
1992	1	14	5	4	1023.5	2944.4	891.5	2	3	1	401.969	378.031	780
1993	1	14	6	5	1023.5	2772.31	881.364	2	3	2	230.966	663.034	894
1994	3	16	10	10	1023.5	3465.38	879	2	4	1	296.131	1189.87	1486
1995	1	14	7	6	1023.5	2228.96	929.583	2	3	1	388.606	664.394	1053
1996	2	16	9	7	1023.5	3724.7	939.077	2	4	2	410.583	848.417	1259
1997	1	16	9	8	1023.5	2802.91	983.583	2	3	1	401.969	740.031	1142
1998	3	13	5	4	1023.5	2536.92	995.769	2	3	1	350.664	324.336	675
1999	0	15	8	9	1023.5	2131.54	990.231	1	3	1	444.958	751.042	1196
[truncated: 3,273 more rows]

## Sheet: reflect
x1	Taxi Distance(meter)
x2	Apron
x3	Airline Affiliation
x4	Arrival queue(aircraft)
x5	Simultaneous pushback count(aircraft)
x6	Simultaneous departure count(aircraft)
x7	Departure queue(aircraft)
x8	30-minute average taxiing time(second)
x9	Average Taxiing Time in the 30-minute Before Pushback (second)
x10	Aircraft type
